# Supplementary material for: Tiered sympathetic control of cardiac function revealed by viral tracing and single cell transcriptome profiling
Source: eLife journal article supplement (doi:10.7554/elife.86295), 2023-05-10

A

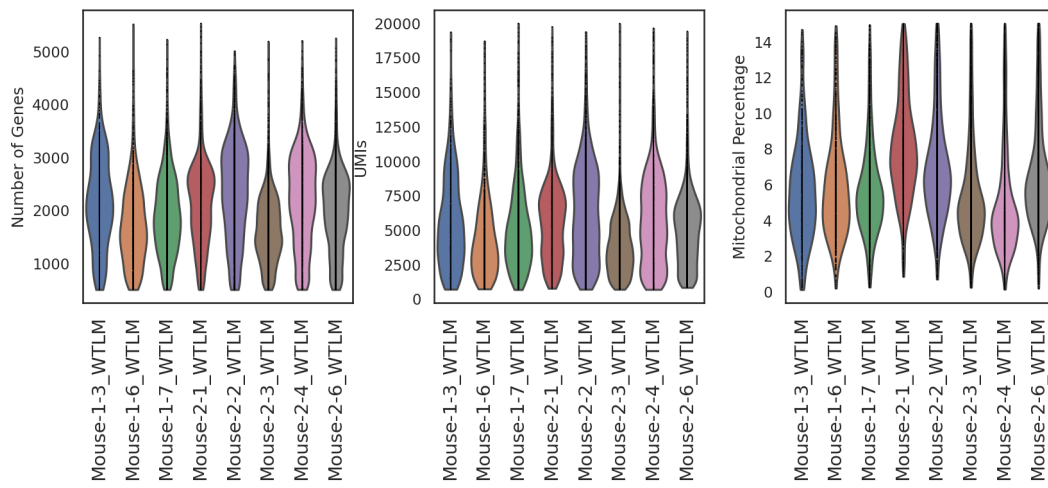

B

|                |             |             |             |           |         |     |               |         |         |      |
|----------------|-------------|-------------|-------------|-----------|---------|-----|---------------|---------|---------|------|
| Mouse-1-3_WTLM | 131         | 28          | 3           | 14        | 60      | 14  | 554           | 14      | 3       | 15   |
| Mouse-1-6_WTLM | 187         | 63          | 4           | 32        | 70      | 12  | 666           | 29      | 4       | 29   |
| Mouse-1-7_WTLM | 199         | 256         | 38          | 132       | 171     | 316 | 1447          | 8       | 8       | 116  |
| Mouse-2-1_WTLM | 136         | 286         | 31          | 226       | 170     | 22  | 1711          | 67      | 14      | 107  |
| Mouse-2-2_WTLM | 63          | 268         | 34          | 211       | 235     | 20  | 1581          | 45      | 7       | 197  |
| Mouse-2-3_WTLM | 199         | 552         | 123         | 419       | 165     | 50  | 2446          | 62      | 47      | 552  |
| Mouse-2-4_WTLM | 148         | 512         | 64          | 291       | 235     | 30  | 2266          | 65      | 41      | 312  |
| Mouse-2-6_WTLM | 233         | 722         | 49          | 259       | 197     | 68  | 2699          | 80      | 44      | 363  |
|                | Endothelial | Fibroblasts | Macrophages | Microglia | Neurons | SMC | SatelliteGlia | Schwann | T-Cells | VLMC |

C

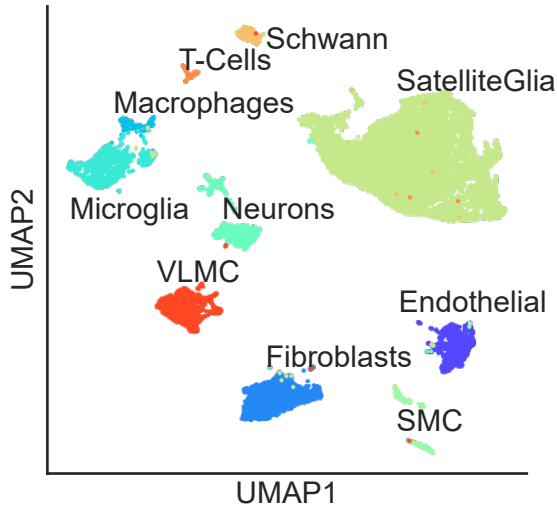

D

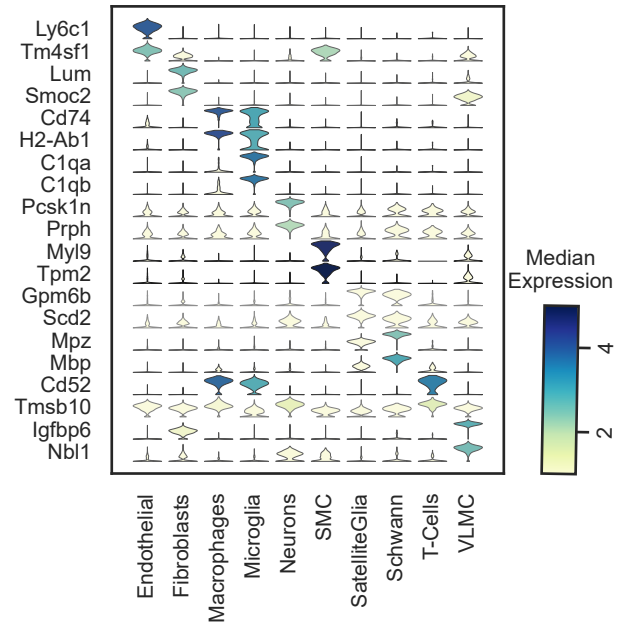

E

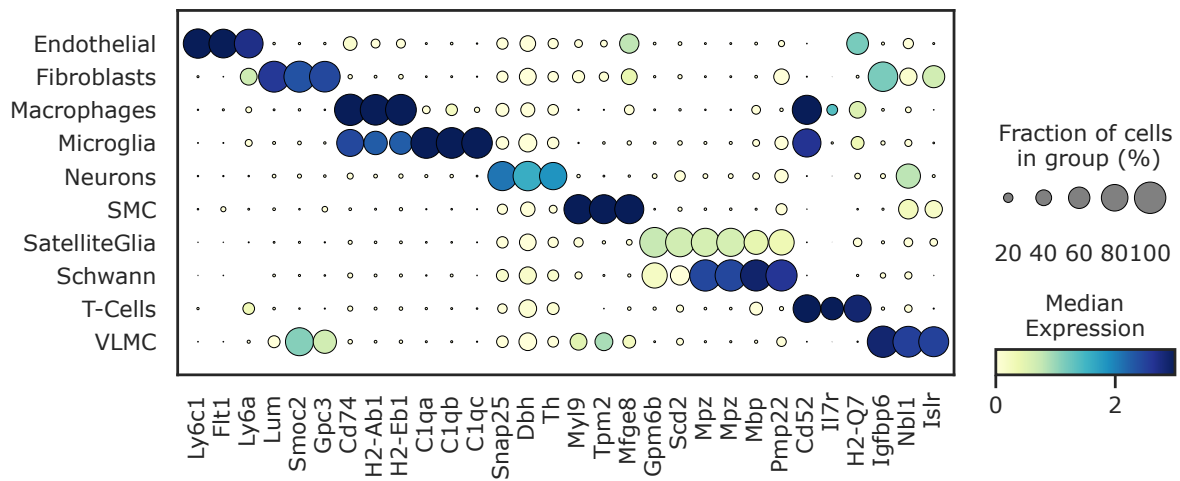

Supplement: supp [file elife-86295-supp-v1.zip]
