# Supplementary material for: Tiered sympathetic control of cardiac function revealed by viral tracing and single cell transcriptome profiling
Source: eLife. 2023 May 10;12:e86295. doi: 10.7554/eLife.86295 (PMC10212561; doi:10.7554/eLife.86295)
Supplement: Supplementary file 2. [file elife-86295-supp2.xlsx]

## Sheet: Sheet 1 - marker.genes
marker.genes
	gene	logFC	pval_adj	celltype
0	Ly6c1	9.82876	0	Endothelial
1	Tm4sf1	5.07958	0	Endothelial
2	Egfl7	6.92315	0	Endothelial
3	Flt1	9.62483	0	Endothelial
4	Emcn	9.63002	0	Endothelial
5	Pecam1	7.63202	0	Endothelial
6	Esam	7.75634	0	Endothelial
7	Ptprb	8.00127	0	Endothelial
8	Hspb1	4.89119	0	Endothelial
9	Ly6a	5.87474	0	Endothelial
10	Abcg2	6.46629	0	Endothelial
11	Ly6e	4.28366	0	Endothelial
12	Cdh5	6.00349	0	Endothelial
13	Rps20	1.89361	0	Endothelial
14	Rps24	1.7942	0	Endothelial
15	Ctla2a	7.64241	0	Endothelial
16	Rpl9	1.68947	0	Endothelial
17	Rpl18a	1.66015	0	Endothelial
18	Rps8	1.62461	0	Endothelial
19	Ecscr	6.92416	0	Endothelial
20	Rpl23	1.66677	0	Endothelial
21	Cxcl12	6.12024	0	Endothelial
22	Srgn	3.94192	0	Endothelial
23	Rps7	1.89425	0	Endothelial
24	Rps12	1.90386	0	Endothelial
25	Rps27	1.79128	0	Endothelial
26	Rps14	1.6884	0	Endothelial
27	Aqp1	7.52293	0	Endothelial
28	Pcp4l1	4.76335	0	Endothelial
29	Rpl37	1.59806	0	Endothelial
30	Rpl34	1.62097	0	Endothelial
31	Rps21	1.70698	0	Endothelial
32	Rpl27a	1.52936	0	Endothelial
33	Gng11	3.05167	0	Endothelial
34	Cavin2	4.46803	0	Endothelial
35	Rps19	1.77607	0	Endothelial
36	Adgrl4	10.0265	0	Endothelial
37	Rps3	1.68893	0	Endothelial
38	Eng	5.66901	0	Endothelial
39	Cyyr1	8.06838	0	Endothelial
40	Tsc22d1	3.43277	0	Endothelial
41	Tshz2	3.92548	0	Endothelial
42	Rpl37a	1.61154	0	Endothelial
43	Rpl18	1.51664	0	Endothelial
44	Cav1	3.98317	0	Endothelial
45	Rps27a	1.50135	0	Endothelial
46	Rps16	1.51057	0	Endothelial
47	Gimap6	6.82958	0	Endothelial
48	Eef1a1	1.43402	0	Endothelial
49	Rps3a1	1.56436	0	Endothelial
50	Rpl15	1.47329	0	Endothelial
51	Fau	1.36991	0	Endothelial
52	Igfbp7	2.83154	0	Endothelial
53	Rpl19	1.31253	0	Endothelial
54	Rpl35a	1.45171	0	Endothelial
55	Kdr	8.60718	0	Endothelial
56	Epas1	3.2732	0	Endothelial
57	Tmsb4x	1.53658	0	Endothelial
58	Rps11	1.54578	0	Endothelial
59	Rpl13	1.27374	0	Endothelial
60	Kitl	4.42106	0	Endothelial
61	Adgrf5	9.30949	0	Endothelial
62	Jam2	3.67158	0	Endothelial
63	Rps5	1.45339	0	Endothelial
64	Tspan13	4.00245	0	Endothelial
65	Rps23	1.4571	0	Endothelial
66	Rpl6	1.43313	0	Endothelial
67	Mmrn2	6.35977	0	Endothelial
68	Slc9a3r2	3.83551	0	Endothelial
69	Cd93	6.72631	0	Endothelial
70	Cldn5	9.37194	0	Endothelial
71	Tinagl1	5.5647	0	Endothelial
72	Rps4x	1.49392	0	Endothelial
73	Plvap	7.77765	0	Endothelial
74	Rpl36a	1.80027	0	Endothelial
75	Ifitm3	2.09087	0	Endothelial
76	Abcb1a	5.3015	0	Endothelial
77	Tie1	9.1886	0	Endothelial
78	Myct1	9.7307	0	Endothelial
79	Rps15a	1.45774	0	Endothelial
80	Rps29	1.34101	0	Endothelial
81	Rpl32	1.41277	0	Endothelial
82	Ifitm2	2.2115	0	Endothelial
83	Slfn5	4.77946	0	Endothelial
84	Rpl22	1.48177	0	Endothelial
85	Rpl7	1.43727	0	Endothelial
86	Rpl28	1.29506	0	Endothelial
87	Cd34	3.31659	0	Endothelial
88	Klf2	3.34653	0	Endothelial
89	Pltp	3.80531	0	Endothelial
90	Rps18	1.51054	0	Endothelial
91	Rpl24	1.25799	2.47435e-308	Endothelial
92	Rpl30	1.30648	2.76283e-306	Endothelial
93	Vwf	7.35063	2.82767e-306	Endothelial
94	Ebf1	3.19972	9.7584e-306	Endothelial
95	Rpl29	1.62564	1.33276e-304	Endothelial
96	Ptma	1.1261	3.57533e-301	Endothelial
97	Arhgap31	2.65742	2.42601e-300	Endothelial
98	Lmo2	4.71941	6.12115e-296	Endothelial
99	Sox17	10.0917	5.35334e-294	Endothelial
100	Rpl26	1.23992	9.26521e-293	Endothelial
101	Rpl35	1.58547	5.02375e-292	Endothelial
102	Rps2	1.27215	1.07517e-291	Endothelial
103	Rpl39	1.52835	3.6616e-291	Endothelial
104	Rpl41	1.02773	8.52847e-291	Endothelial
105	Nfib	2.33356	4.77569e-290	Endothelial
106	Mef2c	3.16443	4.20933e-288	Endothelial
107	Calm1	1.07927	1.93107e-285	Endothelial
108	Rps13	1.27761	3.52799e-283	Endothelial
109	Bvht	4.75544	1.53664e-281	Endothelial
110	Rpl36	1.24818	4.01276e-281	Endothelial
111	Tcf4	2.13929	4.59745e-281	Endothelial
112	Rbpms	3.11861	2.15972e-280	Endothelial
113	C130074G19Rik	5.16185	1.12414e-279	Endothelial
114	Rpl21	1.1962	3.22017e-279	Endothelial
115	Entpd1	4.46759	7.2263e-277	Endothelial
116	Anxa3	3.40591	1.86344e-276	Endothelial
117	Fmo2	4.23741	7.67542e-276	Endothelial
118	Podxl	6.41506	2.25096e-272	Endothelial
119	Ehd4	3.23499	4.13087e-272	Endothelial
120	Rpl8	1.14137	5.43347e-271	Endothelial
121	Ifi203	3.93924	1.49516e-267	Endothelial
122	Rps10	1.05648	3.35227e-267	Endothelial
123	Grrp1	8.90541	4.3329e-264	Endothelial
124	Rps28	1.47586	4.91136e-255	Endothelial
125	Icam2	8.25079	9.22e-253	Endothelial
126	Rplp2	1.18936	1.35916e-252	Endothelial
127	Clu	3.49726	2.84688e-251	Endothelial
128	Tpt1	1.12696	8.52043e-251	Endothelial
129	Rpl17	1.39557	4.79683e-249	Endothelial
130	Rps6	1.45153	9.73893e-247	Endothelial
131	Eef1b2	1.47738	2.26512e-245	Endothelial
132	Rpl38	1.17547	3.28468e-243	Endothelial
133	Mndal	3.7804	6.40744e-243	Endothelial
134	Clec2d	3.69137	2.21797e-241	Endothelial
135	Kank3	5.08127	2.28509e-237	Endothelial
136	S1pr1	6.99914	1.92367e-236	Endothelial
137	Pim3	3.25574	3.80605e-235	Endothelial
138	Gas6	2.71317	1.76967e-232	Endothelial
139	Rbp7	9.05131	4.08653e-231	Endothelial
140	Cd200	2.04726	1.34007e-227	Endothelial
141	Gimap1	6.82637	1.31456e-226	Endothelial
142	Cav2	3.41431	2.86323e-226	Endothelial
143	Rps9	1.13176	1.57337e-225	Endothelial
144	Rasip1	7.15604	6.82467e-225	Endothelial
145	Rpl3	1.04573	8.99319e-224	Endothelial
146	H2-K1	1.447	3.31532e-222	Endothelial
147	Klf4	2.27252	1.59719e-219	Endothelial
148	Rpl12	1.42674	7.3958e-219	Endothelial
149	Naca	1.15308	5.23956e-217	Endothelial
150	Palmd	2.96419	6.46739e-215	Endothelial
151	Bcam	2.64323	9.70168e-215	Endothelial
152	Mast4	3.74231	1.87564e-214	Endothelial
153	Rps26	1.29845	7.16975e-214	Endothelial
154	Tmsb10	1.56421	3.17822e-213	Endothelial
155	Prkch	6.39487	1.84371e-212	Endothelial
156	Myh9	2.43567	1.35651e-210	Endothelial
157	Ets1	3.50121	9.45341e-210	Endothelial
158	Rps25	1.24022	1.239e-209	Endothelial
159	Rpsa	0.982829	1.63056e-209	Endothelial
160	Ccnd2	2.73892	2.17645e-208	Endothelial
161	Thbd	4.91179	6.33851e-206	Endothelial
162	Gngt2	3.98931	1.51032e-204	Endothelial
163	Fxyd5	2.80314	7.29143e-204	Endothelial
164	Id1	4.28451	1.46484e-201	Endothelial
165	Msn	1.96327	2.51752e-201	Endothelial
166	Ier3	2.51581	9.45012e-200	Endothelial
167	H2-Q6	3.93007	1.54388e-198	Endothelial
168	Rpl11	0.894996	4.61171e-197	Endothelial
169	Txnip	2.27011	6.60799e-196	Endothelial
170	Rack1	1.403	2.96846e-195	Endothelial
171	Rplp1	1.01019	6.13992e-195	Endothelial
172	Slc3a2	1.96142	7.65896e-192	Endothelial
173	Sgk1	3.02575	4.46632e-189	Endothelial
174	Calcrl	4.4049	1.17917e-188	Endothelial
175	Iigp1	3.60403	2.45763e-188	Endothelial
176	H2-D1	1.31534	9.65684e-187	Endothelial
177	F11r	3.20228	1.34669e-186	Endothelial
178	Cracr2b	5.40719	1.05443e-185	Endothelial
179	Gpihbp1	9.82763	1.68498e-184	Endothelial
180	Rgs16	3.92491	1.42839e-183	Endothelial
181	Btg1	1.68783	1.76965e-183	Endothelial
182	Nfkbia	1.85786	2.84572e-183	Endothelial
183	Mecom	7.70783	1.19631e-182	Endothelial
184	Rps15	1.17162	5.78702e-182	Endothelial
185	Nrp1	2.20471	3.3121e-181	Endothelial
186	H2-Q7	2.66965	5.17896e-181	Endothelial
187	Gnai2	1.14502	2.07643e-178	Endothelial
188	Luzp1	2.48011	1.43154e-177	Endothelial
189	Tcim	5.30195	5.05526e-177	Endothelial
190	Smco4	3.0993	4.62797e-175	Endothelial
191	Cavin3	1.5889	5.70109e-174	Endothelial
192	Arpc3	1.42274	6.37318e-174	Endothelial
193	Rpl31	1.23449	1.03058e-171	Endothelial
194	AW112010	2.68016	7.52063e-171	Endothelial
195	Cd300lg	5.89406	3.2462e-170	Endothelial
196	Ramp2	1.75469	4.37954e-168	Endothelial
197	Smagp	4.15937	5.18726e-168	Endothelial
198	Rpl5	1.24913	4.72562e-167	Endothelial
199	Tpm4	1.77426	8.26017e-167	Endothelial
200	Ptprg	4.06372	2.05149e-166	Endothelial
201	Atox1	1.38805	1.03311e-165	Endothelial
202	Rflnb	5.25547	1.44776e-163	Endothelial
203	Ostf1	2.00923	2.30212e-161	Endothelial
204	Snx3	1.46808	1.39001e-160	Endothelial
205	Acvrl1	2.60084	1.84583e-160	Endothelial
206	Afdn	2.78331	2.22076e-160	Endothelial
207	Rpl10	1.08668	4.34574e-159	Endothelial
208	Elk3	4.01525	1.21656e-157	Endothelial
209	Aplp2	1.27034	8.18681e-157	Endothelial
210	Clec14a	8.42512	1.71392e-155	Endothelial
211	Lrrfip1	2.95143	4.71466e-154	Endothelial
212	Foxp1	1.93754	7.78735e-154	Endothelial
213	Ets2	3.32567	1.03452e-153	Endothelial
214	Rpl10a	0.96709	5.5074e-153	Endothelial
215	Clic5	7.91058	5.51628e-153	Endothelial
216	Rpl23a	1.19274	4.35291e-151	Endothelial
217	Fli1	5.17251	6.26002e-150	Endothelial
218	Tek	7.80122	1.18832e-149	Endothelial
219	Rpl27	1.44742	1.09355e-148	Endothelial
220	Unc45b	9.19654	1.1665e-148	Endothelial
221	Slco1a4	8.47528	1.65366e-147	Endothelial
222	Rps17	1.05359	1.7933e-143	Endothelial
223	Arhgap29	2.3933	5.0073e-143	Endothelial
224	Rpl14	0.934074	6.87462e-143	Endothelial
225	Hsp90ab1	0.701821	1.28007e-142	Endothelial
226	Tspan5	3.33689	1.79906e-142	Endothelial
227	Ece1	1.9312	2.36551e-142	Endothelial
228	Bst2	1.53548	4.98866e-142	Endothelial
229	Scarb1	2.58779	9.68979e-139	Endothelial
230	AC160336.1	1.74506	1.03522e-138	Endothelial
231	Thrsp	5.40061	2.18577e-138	Endothelial
232	Sp100	3.52537	3.7708e-138	Endothelial
233	Actn4	1.62284	1.793e-135	Endothelial
234	Fgd5	3.29141	8.96009e-135	Endothelial
235	Marc2	1.56616	1.32934e-134	Endothelial
236	Tpm3	1.36901	2.11417e-134	Endothelial
237	St3gal6	2.64479	2.56429e-134	Endothelial
238	Apbb2	2.45949	3.66581e-134	Endothelial
239	Rassf9	8.74335	1.92775e-133	Endothelial
240	Ushbp1	5.14937	5.30989e-133	Endothelial
241	Macf1	1.66525	9.24064e-133	Endothelial
242	Apold1	6.29622	3.07652e-130	Endothelial
243	Ablim1	2.27148	5.81471e-130	Endothelial
244	Nck1	2.24815	1.42064e-129	Endothelial
245	Pls3	2.12321	1.40713e-128	Endothelial
246	Nsa2	1.50185	1.55364e-127	Endothelial
247	Ctnnb1	1.48105	1.36563e-126	Endothelial
248	Slco2a1	4.06436	2.34595e-126	Endothelial
249	Rpl7a	1.06269	1.81836e-125	Endothelial
250	Rab11a	2.00505	3.18589e-125	Endothelial
251	Ltbp4	2.15276	3.34722e-125	Endothelial
252	Mcl1	1.45327	2.7949e-124	Endothelial
253	Rplp0	0.844422	2.88999e-124	Endothelial
254	Gbp4	6.01831	9.28902e-124	Endothelial
255	Gm13889	3.04337	6.26388e-123	Endothelial
256	Adam15	2.44695	7.47751e-123	Endothelial
257	Rpl4	1.11096	8.41712e-123	Endothelial
258	Lpar6	3.92727	1.08744e-122	Endothelial
259	B2m	1.06325	1.28453e-122	Endothelial
260	Actg1	0.793775	1.70221e-121	Endothelial
261	Arid5b	1.81634	3.0948e-121	Endothelial
262	Dnaja1	1.10776	3.48509e-121	Endothelial
263	H2-T23	1.79755	4.58893e-121	Endothelial
264	Gpx1	1.37876	4.8716e-120	Endothelial
265	Myl12b	1.26748	1.05173e-119	Endothelial
266	Tnfrsf1a	2.14728	2.9124e-119	Endothelial
267	Plpp1	2.23697	4.04702e-119	Endothelial
268	Iqgap1	1.34896	1.22344e-118	Endothelial
269	Clic4	1.45012	3.92879e-118	Endothelial
270	Fam13c	4.00892	4.52987e-118	Endothelial
271	Anp32a	1.46937	3.29273e-117	Endothelial
272	Serinc3	1.54884	4.49091e-117	Endothelial
273	Ppp1r2	1.52273	1.47602e-116	Endothelial
274	Hspa1b	1.60049	4.66704e-116	Endothelial
275	Eef2	0.951847	1.01466e-115	Endothelial
276	Ddx5	0.874965	1.56536e-115	Endothelial
277	Socs2	2.32048	6.74383e-115	Endothelial
278	Cd2ap	1.85988	1.2998e-114	Endothelial
279	Adamts9	4.1702	4.086e-114	Endothelial
280	Gimap4	6.8425	5.49218e-113	Endothelial
281	Cox7a2l	1.18158	8.45274e-113	Endothelial
282	Myof	4.37179	1.25755e-112	Endothelial
283	4931406P16Rik	1.91589	2.30051e-112	Endothelial
284	S100a13	1.2177	5.38229e-111	Endothelial
285	Swap70	2.53719	6.69947e-111	Endothelial
286	Tgm2	2.29657	2.0417e-110	Endothelial
287	Nostrin	5.10579	4.37836e-110	Endothelial
288	Tspan12	5.70402	4.94922e-110	Endothelial
289	Lifr	1.74507	4.59287e-109	Endothelial
290	Fabp4	5.66052	2.28658e-108	Endothelial
291	Net1	3.44936	4.38237e-108	Endothelial
292	Uba52	1.92966	1.80941e-106	Endothelial
293	Mfge8	2.02808	4.89083e-105	Endothelial
294	Robo4	9.24166	6.11608e-105	Endothelial
295	Itih5	1.66948	1.23034e-104	Endothelial
296	Cavin1	1.57395	1.34341e-104	Endothelial
297	Cmtm8	6.6371	1.85796e-104	Endothelial
298	Rapgef4	5.0127	1.92155e-104	Endothelial
299	Tagln2	1.33823	3.99919e-104	Endothelial
300	Gadd45g	1.91675	1.5933e-103	Endothelial
301	Adcy4	7.07342	1.62557e-103	Endothelial
302	Icam1	2.95104	2.07532e-103	Endothelial
303	Gimap5	7.21857	2.54945e-103	Endothelial
304	Sgms1	2.26229	1.1551e-101	Endothelial
305	Hspa1a	1.52458	7.76124e-101	Endothelial
306	Eif3e	1.30744	2.12238e-100	Endothelial
307	Tjp1	1.83326	6.07496e-100	Endothelial
308	Myl12a	1.11455	2.97464e-99	Endothelial
309	She	8.51511	5.36196e-99	Endothelial
310	BC028528	3.6312	6.61747e-99	Endothelial
311	Tmod3	1.55804	3.12296e-98	Endothelial
312	Arhgef15	4.56599	4.56914e-98	Endothelial
313	Dusp1	1.58766	5.68904e-98	Endothelial
314	Lmo1	2.16956	6.00498e-97	Endothelial
315	Ier5l	2.11534	6.78866e-97	Endothelial
316	Heg1	4.19265	2.09366e-96	Endothelial
317	Gcnt2	2.08318	2.47521e-96	Endothelial
318	Rps6ka3	2.85569	3.79884e-96	Endothelial
319	Gm11808	1.98066	6.40998e-96	Endothelial
320	Galnt15	6.46229	1.76273e-95	Endothelial
321	Plk2	1.8931	2.03114e-95	Endothelial
322	Btg3	3.62915	6.42064e-95	Endothelial
323	Arl6ip5	1.33127	6.45716e-95	Endothelial
324	Tmem88	3.21905	9.59322e-95	Endothelial
325	Sptbn1	0.862505	3.80617e-94	Endothelial
326	Btf3	0.805821	6.58569e-94	Endothelial
327	Crim1	3.10874	8.86755e-94	Endothelial
328	Sh3glb1	1.08327	9.14693e-94	Endothelial
329	Pdgfb	4.05803	4.20777e-93	Endothelial
330	Phf11d	3.11538	1.03256e-92	Endothelial
331	Tspo	1.02713	1.25899e-91	Endothelial
332	Fzd4	4.38346	1.25934e-91	Endothelial
333	Snrk	1.5667	3.08891e-91	Endothelial
334	Rdx	1.18148	3.14218e-91	Endothelial
335	Prcp	2.71534	2.11443e-89	Endothelial
336	Il6st	1.44473	5.69352e-89	Endothelial
337	Eif3f	1.12439	1.89999e-88	Endothelial
338	Sod1	1.3146	3.41542e-88	Endothelial
339	Ppp2r5a	1.76911	1.19562e-87	Endothelial
340	Gm10076	1.27785	1.20426e-87	Endothelial
341	Mkl2	2.92521	1.54797e-86	Endothelial
342	Sox18	9.67826	2.0342e-86	Endothelial
343	Sbno2	2.06253	2.12862e-86	Endothelial
344	Osmr	3.70248	2.25359e-85	Endothelial
345	Gja1	3.09148	3.08966e-85	Endothelial
346	Eif3h	1.01048	2.13825e-84	Endothelial
347	Eogt	4.09472	1.12942e-83	Endothelial
348	Rasgrp3	5.32536	8.11507e-83	Endothelial
349	Irf7	2.47143	8.19133e-83	Endothelial
350	Dab2ip	1.88328	1.22326e-82	Endothelial
351	Hspa8	0.592913	1.38733e-82	Endothelial
352	Vamp5	1.62927	3.16052e-82	Endothelial
353	Prss23	1.81507	6.1485e-82	Endothelial
354	9930111J21Rik2	3.29267	1.1739e-81	Endothelial
355	Ptgs1	3.53801	1.49513e-81	Endothelial
356	Fryl	1.65057	1.30595e-80	Endothelial
357	Plpp3	1.09529	6.07012e-80	Endothelial
358	Plcb1	4.5658	1.10669e-79	Endothelial
359	Pqlc1	2.72971	3.59807e-79	Endothelial
360	Tm6sf1	2.5297	4.55158e-79	Endothelial
361	Ldha	1.09884	1.26174e-78	Endothelial
362	Lrg1	8.84964	2.77329e-78	Endothelial
363	Trim47	3.18282	6.58117e-78	Endothelial
364	Crip2	0.980793	4.35697e-77	Endothelial
365	Ipo11	3.24598	6.98636e-77	Endothelial
366	Lrrc32	4.4429	1.4866e-76	Endothelial
367	Pcdh17	1.712	3.4824e-76	Endothelial
368	Samd12	3.45916	7.29162e-76	Endothelial
369	Polr1d	1.07297	1.17179e-75	Endothelial
370	Upp1	6.44244	2.50513e-75	Endothelial
371	Pkp4	2.63984	1.43903e-74	Endothelial
372	Gbp9	3.66692	3.37477e-74	Endothelial
373	Eef1g	0.928135	9.70543e-74	Endothelial
374	Lepr	3.53968	1.76399e-73	Endothelial
375	Vegfc	7.65079	2.44051e-73	Endothelial
376	Bmpr2	1.52517	4.99296e-72	Endothelial
377	Rasgrf2	3.69657	1.05596e-71	Endothelial
378	Afap1l1	3.92007	1.30227e-71	Endothelial
379	Dock4	2.20155	2.34728e-71	Endothelial
380	Wwtr1	1.25272	7.4178e-71	Endothelial
381	8430408G22Rik	7.86669	9.16725e-71	Endothelial
382	Npm1	0.801124	2.38859e-70	Endothelial
383	Dennd5b	2.04877	2.91233e-70	Endothelial
384	Prom1	3.21545	4.88044e-70	Endothelial
385	Csrp2	1.73718	1.01602e-69	Endothelial
386	Ubc	0.828683	1.46526e-69	Endothelial
387	Wasf2	1.2124	1.54564e-69	Endothelial
388	Lmcd1	4.45574	1.83301e-69	Endothelial
389	Fnbp1l	2.89084	3.15234e-69	Endothelial
390	Edn1	7.0181	3.29371e-69	Endothelial
391	Ncoa7	1.4846	3.38373e-69	Endothelial
392	Elf1	1.75096	5.60119e-69	Endothelial
393	Rps27rt	1.70024	6.88322e-69	Endothelial
394	Lipe	2.63556	1.30122e-68	Endothelial
395	Rai14	3.24034	1.33101e-68	Endothelial
396	Bmx	9.43075	1.69812e-68	Endothelial
397	Lef1	8.31945	2.84299e-68	Endothelial
398	Plxna2	3.44612	3.80363e-68	Endothelial
399	Pfdn5	0.660465	3.94143e-68	Endothelial
400	Zfp366	7.37619	1.85072e-67	Endothelial
401	Hdac7	2.59657	1.89742e-67	Endothelial
402	Atp5g2	0.81565	3.46317e-67	Endothelial
403	Rsad2	3.04069	3.75177e-67	Endothelial
404	Npr1	4.75005	7.13147e-67	Endothelial
405	Tmem204	4.02722	7.30932e-67	Endothelial
406	Tspan4	2.66664	1.06968e-66	Endothelial
407	Myl6	0.587608	1.61273e-66	Endothelial
408	Rhob	1.308	6.29218e-66	Endothelial
409	Bnip2	1.18201	7.0354e-66	Endothelial
410	Psme1	1.03713	7.25596e-66	Endothelial
411	Jcad	3.17415	1.81127e-65	Endothelial
412	Ldb2	3.18937	2.13919e-65	Endothelial
413	Selp	8.29859	5.39454e-65	Endothelial
414	Itpkb	2.00588	5.55949e-65	Endothelial
415	Insr	2.41891	1.51801e-64	Endothelial
416	Ppfibp1	1.58568	1.87431e-64	Endothelial
417	Fkbp1a	0.885884	2.94521e-64	Endothelial
418	Smad7	2.54887	3.1462e-64	Endothelial
419	Grasp	2.10189	5.65568e-64	Endothelial
420	Sh3bgrl	1.25761	8.46529e-64	Endothelial
421	Mylk	2.12676	8.47925e-64	Endothelial
422	Jag2	3.68937	1.77991e-63	Endothelial
423	Slc39a10	2.29832	2.72664e-63	Endothelial
424	Emp1	1.91855	3.97831e-63	Endothelial
425	Myo1b	2.43423	4.60006e-63	Endothelial
426	Cpd	1.81075	4.92139e-63	Endothelial
427	Hip1	1.72221	5.54045e-63	Endothelial
428	AU021092	7.00157	1.16684e-62	Endothelial
429	Filip1	2.35132	2.14435e-62	Endothelial
430	St8sia4	3.58832	2.42125e-62	Endothelial
431	Arl4a	1.24791	4.76348e-62	Endothelial
432	Ccnb1ip1	1.94509	5.77392e-62	Endothelial
433	Uaca	1.38198	9.81775e-62	Endothelial
434	Ifi44	5.76657	1.37131e-61	Endothelial
435	Slc6a6	2.2258	1.85515e-61	Endothelial
436	Gimap9	6.16445	1.25302e-60	Endothelial
437	Eif4b	1.27803	2.9912e-60	Endothelial
438	Nedd9	2.33221	3.91861e-60	Endothelial
439	Rapgef5	1.38272	5.06259e-60	Endothelial
440	Hs3st1	3.22148	8.08241e-60	Endothelial
441	Rap1b	1.05643	8.36829e-60	Endothelial
442	Epha4	6.05973	1.2145e-59	Endothelial
443	Adgrl2	2.10692	2.14429e-59	Endothelial
444	Clic1	0.785942	2.77687e-59	Endothelial
445	Sema6a	1.88608	1.07217e-58	Endothelial
446	Fosl2	1.59283	2.33182e-58	Endothelial
447	Arap3	5.22205	2.82203e-58	Endothelial
448	Ptpn14	2.53693	3.28133e-58	Endothelial
449	Dlc1	1.35504	4.2165e-58	Endothelial
450	Cd47	0.874303	2.66943e-57	Endothelial
451	Plxnd1	1.44422	4.91286e-57	Endothelial
452	Cdh13	4.98836	4.98785e-57	Endothelial
453	Dock9	1.8166	6.66436e-57	Endothelial
454	Spns2	4.4592	7.87419e-57	Endothelial
455	Ybx1	0.711432	8.70547e-57	Endothelial
456	Swt1	1.19266	1.50692e-56	Endothelial
457	Rassf3	2.85499	1.75075e-56	Endothelial
458	Zfp36l1	0.918476	1.88029e-56	Endothelial
459	Grap	3.54737	3.64858e-56	Endothelial
460	Crip1	0.851498	7.29793e-56	Endothelial
461	Ifnar2	1.18365	8.85794e-56	Endothelial
462	Pitpnc1	1.76107	1.68527e-55	Endothelial
463	Cbfa2t3	2.90548	1.91031e-55	Endothelial
464	Hbegf	1.53673	2.65084e-55	Endothelial
465	Acer2	6.63908	6.50468e-55	Endothelial
466	Fas	2.86222	6.63007e-55	Endothelial
467	Tanc1	2.18196	1.65525e-54	Endothelial
468	Ndufa8	0.971552	2.03376e-54	Endothelial
469	Cd151	0.946278	2.25434e-54	Endothelial
470	Slc16a4	7.26355	2.36078e-54	Endothelial
471	Psmb9	1.37393	2.49953e-54	Endothelial
472	Ch25h	6.67927	1.58871e-53	Endothelial
473	Dusp3	1.46482	3.01373e-53	Endothelial
474	Cdc42ep3	1.46966	7.36487e-53	Endothelial
475	Ppic	1.55606	1.38666e-52	Endothelial
476	Sypl	1.33666	1.59033e-52	Endothelial
477	Uqcrh	0.63451	1.63045e-52	Endothelial
478	Sntb2	1.22765	2.11982e-52	Endothelial
479	Rgs5	3.7193	2.44888e-52	Endothelial
480	Crybg3	2.68532	5.19447e-52	Endothelial
481	Lims2	2.05057	1.38543e-51	Endothelial
482	Tmem255b	4.64606	1.64504e-51	Endothelial
483	Il10rb	1.4883	2.73117e-51	Endothelial
484	Gm32688	10.3168	2.77303e-51	Endothelial
485	Mpzl1	1.77178	4.15164e-51	Endothelial
486	Trim30a	2.08109	4.26738e-51	Endothelial
487	Ppp1r16b	4.43706	4.4713e-51	Endothelial
488	Ccm2l	5.2885	4.63263e-51	Endothelial
489	Shank3	5.27313	8.53147e-51	Endothelial
490	Rpl13a	1.13997	9.43677e-51	Endothelial
491	Zcchc6	1.29182	1.0576e-50	Endothelial
492	Shroom4	4.38252	1.10516e-50	Endothelial
493	Osbpl9	1.35479	1.17195e-50	Endothelial
494	Ptprm	3.18992	1.3559e-50	Endothelial
495	Tmed5	1.27721	1.70492e-50	Endothelial
496	Slc38a2	0.909135	2.15799e-50	Endothelial
497	Utrn	0.862023	2.16093e-50	Endothelial
498	B4galt4	2.67039	2.47191e-50	Endothelial
499	2900026A02Rik	2.73896	2.68066e-50	Endothelial
500	Ankrd33b	3.57226	2.93699e-50	Endothelial
501	Mgp	1.10501	5.87935e-50	Endothelial
502	Pabpc1	0.942203	6.14238e-50	Endothelial
503	Ube2d3	0.799697	6.6007e-50	Endothelial
504	Mgll	1.08769	9.40846e-50	Endothelial
505	Itpr1	2.0351	1.63275e-49	Endothelial
506	Bag3	1.17139	1.94977e-49	Endothelial
507	Ier5	1.21833	2.23792e-49	Endothelial
508	Ccdc85b	1.78787	4.4557e-49	Endothelial
509	Fam167b	5.8811	7.295e-49	Endothelial
510	Anxa7	1.20498	8.56536e-49	Endothelial
511	Arhgef7	1.75029	8.75323e-49	Endothelial
512	Ehd2	1.37628	1.33815e-48	Endothelial
513	C1qtnf9	5.98012	2.24366e-48	Endothelial
514	Ralgapa1	1.37571	2.40018e-48	Endothelial
515	Snrpg	0.967049	4.21877e-48	Endothelial
516	Sept4	2.12475	8.91371e-48	Endothelial
517	Hecw2	4.27884	1.09247e-47	Endothelial
518	Efna1	3.93238	1.65397e-47	Endothelial
519	Mef2a	1.19534	2.24478e-47	Endothelial
520	Ttc28	1.50603	2.89764e-47	Endothelial
521	Fam43a	3.26206	4.44687e-47	Endothelial
522	Fmnl3	3.59378	5.8711e-47	Endothelial
523	Arpc2	0.771664	9.21841e-47	Endothelial
524	Tnfsf10	6.26992	9.52074e-47	Endothelial
525	Rnf125	4.35074	2.14556e-46	Endothelial
526	Lrrc8a	1.70252	2.88921e-46	Endothelial
527	St6galnac2	5.04714	4.58323e-46	Endothelial
528	Efnb2	2.87154	5.78448e-46	Endothelial
529	Eef1d	0.671103	5.90965e-46	Endothelial
530	Lrrc8c	1.31757	8.60537e-46	Endothelial
531	Hsp90aa1	0.767264	9.93736e-46	Endothelial
532	Ceacam1	4.27062	1.16257e-45	Endothelial
533	Cthrc1	4.17104	3.059e-45	Endothelial
534	Dll4	8.50108	4.3809e-45	Endothelial
535	Tgfb1	1.518	5.13413e-45	Endothelial
536	Mall	9.33126	6.29915e-45	Endothelial
537	Hprt	1.26899	7.82523e-45	Endothelial
538	2310001H17Rik	4.13586	1.66613e-44	Endothelial
539	Rras	0.892038	2.34344e-44	Endothelial
540	Jak1	0.914241	2.64358e-44	Endothelial
541	Dock6	2.03463	3.46705e-44	Endothelial
542	Adamts1	1.26025	4.20807e-44	Endothelial
543	Nfat5	1.08486	4.67174e-44	Endothelial
544	Cped1	1.48144	5.03112e-44	Endothelial
545	Tnfaip1	1.45531	5.49158e-44	Endothelial
546	Eif2s2	0.771891	6.74936e-44	Endothelial
547	Kctd12	1.46206	6.88052e-44	Endothelial
548	Ppp1r15a	0.91026	8.92879e-44	Endothelial
549	Ppp1r12a	0.988871	1.15181e-43	Endothelial
550	Igfbp3	3.9709	1.5911e-43	Endothelial
551	Pde4b	1.47153	1.59153e-43	Endothelial
552	Nxn	1.35446	3.36742e-43	Endothelial
553	Hnrnpa1	0.913312	4.05473e-43	Endothelial
554	Chst15	4.6071	4.47259e-43	Endothelial
555	Prex2	0.956421	8.43427e-43	Endothelial
556	Rtl8a	1.18296	1.1414e-42	Endothelial
557	Sox7	8.13822	1.95616e-42	Endothelial
558	Hnrnpf	0.789129	2.40221e-42	Endothelial
559	Sema7a	5.31146	3.23274e-42	Endothelial
560	Dnm3	1.08172	4.56559e-42	Endothelial
561	Chchd2	0.436137	5.37572e-42	Endothelial
562	Pkn3	7.209	7.90002e-42	Endothelial
563	Svil	1.76625	8.33898e-42	Endothelial
564	Csf2rb	3.63933	1.64115e-41	Endothelial
565	Sorbs2	0.915511	1.64641e-41	Endothelial
566	Pir	2.18613	1.66999e-41	Endothelial
567	Bcl6b	6.83455	2.00272e-41	Endothelial
568	Cnot6l	1.59967	2.89918e-41	Endothelial
569	Tpst2	1.64232	4.42357e-41	Endothelial
570	Mcf2l	2.30881	4.48818e-41	Endothelial
571	Procr	3.89492	4.84811e-41	Endothelial
572	Hsph1	1.13785	1.11409e-40	Endothelial
573	Picalm	1.09898	1.30015e-40	Endothelial
574	Hoxd8	3.87084	1.50926e-40	Endothelial
575	Ralb	1.49851	2.88372e-40	Endothelial
576	Gnb1	0.753005	2.9418e-40	Endothelial
577	Chp2	1.78669	3.22867e-40	Endothelial
578	Ebf3	5.17888	3.28789e-40	Endothelial
579	Prkd2	3.03065	8.56467e-40	Endothelial
580	H2-T22	1.12563	1.05833e-39	Endothelial
581	Stom	2.40259	1.30001e-39	Endothelial
582	Asap1	1.14671	2.19403e-39	Endothelial
583	Abracl	1.31141	4.10914e-39	Endothelial
584	Sele	9.57813	5.24735e-39	Endothelial
585	Cd38	4.53235	6.07499e-39	Endothelial
586	Tgfbr2	1.27693	6.61719e-39	Endothelial
587	Tspan9	2.96665	1.02025e-38	Endothelial
588	Itga6	1.08405	1.03541e-38	Endothelial
589	Eln	2.60724	1.20938e-38	Endothelial
590	Cmip	1.37616	1.3045e-38	Endothelial
591	Kctd10	1.67697	1.67563e-38	Endothelial
592	Btbd7	1.01905	2.71101e-38	Endothelial
593	Piezo1	3.55589	3.35952e-38	Endothelial
594	Btg2	0.925369	4.27175e-38	Endothelial
595	Mfng	4.13196	7.31436e-38	Endothelial
596	Tra2b	0.826332	7.60752e-38	Endothelial
597	Vcam1	1.81236	7.83763e-38	Endothelial
598	Cct4	0.839997	1.17123e-37	Endothelial
599	Rapgef3	3.22998	1.97004e-37	Endothelial
600	Ptbp3	1.12825	2.07976e-37	Endothelial
601	Plec	0.87107	2.13399e-37	Endothelial
602	H2-Q4	0.844043	5.56666e-37	Endothelial
603	Tjp2	2.3371	5.67688e-37	Endothelial
604	Actb	0.433109	6.31813e-37	Endothelial
605	Sdcbp	0.84574	6.89517e-37	Endothelial
606	Glul	1.19323	7.7079e-37	Endothelial
607	Ppp1cc	1.03954	1.15321e-36	Endothelial
608	H2afz	0.656051	1.22793e-36	Endothelial
609	Sptlc2	1.60061	1.83314e-36	Endothelial
610	Hotairm1	1.54719	2.92267e-36	Endothelial
611	Hif1a	1.40451	2.979e-36	Endothelial
612	Kctd12b	2.90314	3.13801e-36	Endothelial
613	Rbm3	0.861701	3.78926e-36	Endothelial
614	Trim16	4.29106	3.87348e-36	Endothelial
615	Ndel1	1.10145	4.08257e-36	Endothelial
616	Rapgef2	1.50862	6.7257e-36	Endothelial
617	Lmna	0.7681	7.44052e-36	Endothelial
618	Mgst1	1.1225	8.19512e-36	Endothelial
619	Ttll7	1.49767	1.73341e-35	Endothelial
620	Sav1	1.57944	1.86193e-35	Endothelial
621	Spock2	1.50928	2.61035e-35	Endothelial
622	Spint2	3.13804	2.64999e-35	Endothelial
623	Gata2	1.72359	2.98514e-35	Endothelial
624	Xdh	2.87963	3.133e-35	Endothelial
625	Imp3	0.922382	3.16328e-35	Endothelial
626	Akap13	0.931604	3.29941e-35	Endothelial
627	Nos3	3.42613	4.5019e-35	Endothelial
628	Hspe1	0.726564	1.25573e-34	Endothelial
629	Ptprk	4.54826	1.26316e-34	Endothelial
630	Tmem252	9.48768	1.31705e-34	Endothelial
631	Rgs3	1.33325	1.3539e-34	Endothelial
632	Tes	3.76088	1.50677e-34	Endothelial
633	Fzd6	5.34459	2.28994e-34	Endothelial
634	Stat3	0.844047	2.28994e-34	Endothelial
635	Gbp7	0.999633	3.80059e-34	Endothelial
636	Hspa12b	3.11396	4.45666e-34	Endothelial
637	Pdcd4	1.1334	4.73498e-34	Endothelial
638	Rac1	0.754778	5.58369e-34	Endothelial
639	Sec14l1	1.22732	7.14233e-34	Endothelial
640	Timeless	3.65661	8.01051e-34	Endothelial
641	Utp3	1.2588	1.0273e-33	Endothelial
642	Tgoln1	0.855186	1.57701e-33	Endothelial
643	Tdrp	3.33281	1.81518e-33	Endothelial
644	Mtus1	1.51522	2.30217e-33	Endothelial
645	Pcbp1	0.75267	4.56584e-33	Endothelial
646	Prelid2	3.76334	5.51551e-33	Endothelial
647	Yes1	2.11521	1.37912e-32	Endothelial
648	Hnrnpab	0.853805	1.42859e-32	Endothelial
649	Casp8	2.64757	2.14847e-32	Endothelial
650	Myo1c	1.43508	3.067e-32	Endothelial
651	Rnd1	4.30966	3.07573e-32	Endothelial
652	Pcbp2	0.75014	3.49373e-32	Endothelial
653	Tbc1d1	3.03758	3.65679e-32	Endothelial
654	Flnb	1.29006	3.80729e-32	Endothelial
655	Etl4	1.95717	4.96545e-32	Endothelial
656	App	0.552496	6.66537e-32	Endothelial
657	Cebpg	1.14573	7.1607e-32	Endothelial
658	Anxa1	1.52214	1.07305e-31	Endothelial
659	Ddx21	1.33381	1.13698e-31	Endothelial
660	Slc12a7	2.55243	1.55173e-31	Endothelial
661	Bok	3.80733	1.96889e-31	Endothelial
662	Nova2	3.73882	2.62261e-31	Endothelial
663	Srarp	9.55153	3.66022e-31	Endothelial
664	Arl4d	2.27399	3.80445e-31	Endothelial
665	Cflar	1.09166	3.94487e-31	Endothelial
666	Atp1b3	0.872949	4.69257e-31	Endothelial
667	Apol10b	7.93706	4.90711e-31	Endothelial
668	Txn1	0.555806	1.06956e-30	Endothelial
669	Nfe2l2	1.00113	1.40328e-30	Endothelial
670	Slfn2	1.8866	1.40337e-30	Endothelial
671	Rpl36al	0.727739	1.77004e-30	Endothelial
672	Nfe2l1	0.757612	1.98953e-30	Endothelial
673	Exoc3l2	6.89828	2.98946e-30	Endothelial
674	Aplnr	7.56287	3.18841e-30	Endothelial
675	Nuak1	1.86007	7.44403e-30	Endothelial
676	Gm12002	7.69612	9.72081e-30	Endothelial
677	Znrf1	1.47665	1.02956e-29	Endothelial
678	Snrpe	0.65766	1.14306e-29	Endothelial
679	Lmo7	2.04643	1.15762e-29	Endothelial
680	Zfp979	4.58738	1.43982e-29	Endothelial
681	Nop53	0.960822	1.56957e-29	Endothelial
682	Spag9	0.647504	1.82035e-29	Endothelial
683	Hmcn1	1.11453	1.87405e-29	Endothelial
684	Pde8a	2.48356	2.12343e-29	Endothelial
685	Myadm	1.49687	2.26795e-29	Endothelial
686	Adrb2	2.00727	2.37564e-29	Endothelial
687	N4bp3	3.40796	3.32462e-29	Endothelial
688	Sigirr	6.42378	3.66949e-29	Endothelial
689	Cd36	3.47782	4.45742e-29	Endothelial
690	Mcc	2.82139	5.22133e-29	Endothelial
691	Trim25	1.57735	5.28478e-29	Endothelial
692	Ptpn18	1.09564	5.75048e-29	Endothelial
693	Ddx3x	0.787792	6.91516e-29	Endothelial
694	Serpinb6a	0.613612	6.93321e-29	Endothelial
695	Nop58	0.89302	8.66453e-29	Endothelial
696	Klf7	0.684467	9.46065e-29	Endothelial
697	Mrpl52	0.634989	1.24296e-28	Endothelial
698	Sem1	0.515425	1.62921e-28	Endothelial
699	Sik1	2.46657	3.69683e-28	Endothelial
700	Col4a2	0.979342	4.05892e-28	Endothelial
701	Parvb	2.84678	6.48672e-28	Endothelial
702	Cds2	0.977272	7.67036e-28	Endothelial
703	Galnt18	2.92424	1.02358e-27	Endothelial
704	Crispld1	2.16224	1.14523e-27	Endothelial
705	Vasp	1.29856	1.28842e-27	Endothelial
706	Nxpe2	9.20459	1.90308e-27	Endothelial
707	Snu13	0.62885	1.94225e-27	Endothelial
708	Map2k3	1.58999	1.96769e-27	Endothelial
709	Cx3cl1	4.18859	2.59285e-27	Endothelial
710	Msrb3	3.14043	2.70812e-27	Endothelial
711	Sema3g	3.34662	3.08938e-27	Endothelial
712	Pfn1	0.582687	3.51494e-27	Endothelial
713	Dab2	1.5653	4.93839e-27	Endothelial
714	Stab1	1.57579	6.87017e-27	Endothelial
715	Itgb1	0.567773	7.35913e-27	Endothelial
716	Gls	0.817294	1.26732e-26	Endothelial
717	Adam10	1.01371	1.62032e-26	Endothelial
718	Tmem2	2.71086	1.73157e-26	Endothelial
719	Fry	1.54479	1.90499e-26	Endothelial
720	Cd74	0.562921	2.2229e-26	Endothelial
721	Ripor1	1.99404	2.80678e-26	Endothelial
722	Slc50a1	0.726402	3.29204e-26	Endothelial
723	Peak1	1.16714	3.32283e-26	Endothelial
724	Esyt1	1.35963	3.75633e-26	Endothelial
725	Pnp	0.858091	3.75827e-26	Endothelial
726	Cr1l	1.00043	4.34397e-26	Endothelial
727	Ifi47	1.50293	4.67396e-26	Endothelial
728	Sptan1	0.658092	6.1853e-26	Endothelial
729	Susd4	3.7572	6.38526e-26	Endothelial
730	Rtp4	1.19463	6.81694e-26	Endothelial
731	Eps8l2	6.86096	7.29534e-26	Endothelial
732	Nbdy	0.85628	7.58742e-26	Endothelial
733	Pros1	1.10821	8.49269e-26	Endothelial
734	Plscr1	1.64834	9.16771e-26	Endothelial
735	Rhoj	0.883778	1.11839e-25	Endothelial
736	Lipa	1.43608	1.17785e-25	Endothelial
737	Gimap8	5.67559	1.45162e-25	Endothelial
738	Ubald2	1.0461	1.49962e-25	Endothelial
739	Map3k20	2.02241	1.56144e-25	Endothelial
740	Ccnyl1	3.02381	1.63095e-25	Endothelial
741	Maoa	0.728172	2.18611e-25	Endothelial
742	Klhl24	1.07984	2.61873e-25	Endothelial
743	Pdgfd	4.50052	3.43545e-25	Endothelial
744	Rbm18	1.06318	4.38376e-25	Endothelial
745	Akap2	2.10474	4.43602e-25	Endothelial
746	Mtss1	1.28172	5.34834e-25	Endothelial
747	Cdk17	2.12328	5.36174e-25	Endothelial
748	Cacybp	0.69713	6.13947e-25	Endothelial
749	Gm26532	1.00304	6.62942e-25	Endothelial
750	Esyt2	1.12822	8.2793e-25	Endothelial
751	Adipor1	0.906094	8.42368e-25	Endothelial
752	Gm2000	1.3976	8.7077e-25	Endothelial
753	Prpf40b	1.72469	8.99147e-25	Endothelial
754	Psmb8	0.616861	9.44256e-25	Endothelial
755	Rbp1	0.818578	9.57982e-25	Endothelial
756	Prrg2	1.65692	9.58256e-25	Endothelial
757	Mctp1	2.52213	9.63878e-25	Endothelial
758	Sertad1	1.00482	1.26681e-24	Endothelial
759	Nmi	1.34317	1.33601e-24	Endothelial
760	Filip1l	1.64966	1.40051e-24	Endothelial
761	Lima1	0.855387	1.4119e-24	Endothelial
762	Skap2	1.14937	1.68909e-24	Endothelial
763	Tmcc3	1.46199	1.71498e-24	Endothelial
764	Hspd1	0.677521	2.05971e-24	Endothelial
765	Sh3bp4	2.37209	2.08436e-24	Endothelial
766	Gtpbp4	0.971423	2.14556e-24	Endothelial
767	Hhex	4.08463	2.16275e-24	Endothelial
768	Tapbp	0.751316	2.49356e-24	Endothelial
769	Pdlim1	2.71764	2.73683e-24	Endothelial
770	Itga5	2.54111	3.57657e-24	Endothelial
771	Mafb	1.27763	5.42004e-24	Endothelial
772	Tns2	1.79843	5.47352e-24	Endothelial
773	Igtp	1.17069	6.0058e-24	Endothelial
774	Ssh1	1.39814	7.0796e-24	Endothelial
775	Id3	0.689504	8.08293e-24	Endothelial
776	Ppp1r13b	1.54699	1.04326e-23	Endothelial
777	Wwc2	0.895732	1.04676e-23	Endothelial
778	Syne1	0.922069	1.08392e-23	Endothelial
779	Ppp1r10	0.778762	1.08923e-23	Endothelial
780	Syt15	6.56035	1.20507e-23	Endothelial
781	Atrx	0.634904	1.40268e-23	Endothelial
782	Top1	0.600799	1.41469e-23	Endothelial
783	Gch1	1.04628	1.51655e-23	Endothelial
784	Tmem176b	0.568138	1.52041e-23	Endothelial
785	Rpl22l1	0.509507	1.79377e-23	Endothelial
786	Nes	1.85272	1.96075e-23	Endothelial
787	Mbnl1	0.698253	2.32816e-23	Endothelial
788	Pcmtd1	0.768418	2.33586e-23	Endothelial
789	Vgll4	0.729789	2.74728e-23	Endothelial
790	Plscr2	0.938099	2.7703e-23	Endothelial
791	Lrch1	2.52537	3.09941e-23	Endothelial
792	Ppp3ca	0.725703	3.83159e-23	Endothelial
793	Crk	0.953766	3.832e-23	Endothelial
794	Arhgef1	0.775869	3.97563e-23	Endothelial
795	Akr1c14	7.26198	4.58473e-23	Endothelial
796	Xiap	0.854768	4.70466e-23	Endothelial
797	Tnfrsf10b	5.90335	4.89232e-23	Endothelial
798	Slc30a1	1.88787	6.0806e-23	Endothelial
799	Pkig	0.730625	6.26675e-23	Endothelial
800	Triobp	1.50072	6.33352e-23	Endothelial
801	Pglyrp1	3.85955	6.57844e-23	Endothelial
802	Ptges3	0.60798	7.1189e-23	Endothelial
803	Ptprr	2.31022	7.38284e-23	Endothelial
804	Magoh	0.777905	7.9362e-23	Endothelial
805	Slc39a8	4.26267	8.48279e-23	Endothelial
806	Fcho2	0.863949	8.70846e-23	Endothelial
807	Dusp11	0.710462	8.82306e-23	Endothelial
808	Pdlim5	1.05842	1.17902e-22	Endothelial
809	Sp110	2.78844	1.31825e-22	Endothelial
810	Mospd2	1.23091	1.33755e-22	Endothelial
811	Rcan1	1.25267	1.43943e-22	Endothelial
812	Ephx1	1.19936	1.79539e-22	Endothelial
813	Mfhas1	1.80139	2.11655e-22	Endothelial
814	Fam129b	1.24855	2.50934e-22	Endothelial
815	Plekhg1	1.88529	2.83016e-22	Endothelial
816	5031425E22Rik	1.17177	3.50308e-22	Endothelial
817	Pak1ip1	0.790183	5.20399e-22	Endothelial
818	Rassf1	0.894837	6.99636e-22	Endothelial
819	Enah	1.21986	7.85393e-22	Endothelial
820	Lamb2	0.790834	9.41884e-22	Endothelial
821	Kif5b	0.53171	9.79814e-22	Endothelial
822	Alyref	0.808181	1.02225e-21	Endothelial
823	Spry1	1.23841	1.32235e-21	Endothelial
824	Scarf1	5.34359	1.33112e-21	Endothelial
825	1810037I17Rik	0.533577	1.62538e-21	Endothelial
826	Pcf11	0.906373	1.85361e-21	Endothelial
827	Gm4070	4.63729	2.63891e-21	Endothelial
828	Atxn1	1.72753	2.66028e-21	Endothelial
829	Slk	0.88069	2.75294e-21	Endothelial
830	Elmo1	1.77026	2.76702e-21	Endothelial
831	Nos1ap	2.38695	3.09084e-21	Endothelial
832	Msx1	3.0161	3.67255e-21	Endothelial
833	Gjc1	1.99951	4.16731e-21	Endothelial
834	Fam198b	0.933104	4.41617e-21	Endothelial
835	Aqp11	3.39317	4.47029e-21	Endothelial
836	Hoxd3os1	3.26415	4.63825e-21	Endothelial
837	Cyb5r3	0.670277	4.74432e-21	Endothelial
838	Stx3	2.16005	5.32794e-21	Endothelial
839	Pik3c2a	1.12262	5.63564e-21	Endothelial
840	Ccdc88c	4.3904	6.37144e-21	Endothelial
841	St3gal4	1.15933	6.76361e-21	Endothelial
842	Gja4	4.62704	6.91862e-21	Endothelial
843	Fez2	0.92232	7.30468e-21	Endothelial
844	Yy1	0.661063	7.41806e-21	Endothelial
845	Nop10	0.635222	8.44542e-21	Endothelial
846	Nucb1	0.71414	9.96162e-21	Endothelial
847	Lbr	1.38057	1.00136e-20	Endothelial
848	Ace	1.97485	1.14191e-20	Endothelial
849	Samhd1	0.901246	1.30959e-20	Endothelial
850	Dnaja4	1.4877	1.46803e-20	Endothelial
851	Ndufa6	0.559619	1.46803e-20	Endothelial
852	Ifnar1	1.31854	1.75329e-20	Endothelial
853	Myo1e	1.72508	1.80945e-20	Endothelial
854	Mustn1	1.23159	1.8555e-20	Endothelial
855	Shisa5	0.780409	1.9929e-20	Endothelial
856	Smc1a	0.628326	2.04854e-20	Endothelial
857	Elk4	1.20546	2.2377e-20	Endothelial
858	D16Ertd472e	2.39068	2.28402e-20	Endothelial
859	Cdkn1a	0.857126	2.6256e-20	Endothelial
860	Epb41	1.51111	2.8821e-20	Endothelial
861	Pdcd6ip	0.878286	3.071e-20	Endothelial
862	Cdc42bpb	1.00576	4.0796e-20	Endothelial
863	Itpr2	1.30614	5.04449e-20	Endothelial
864	Dock1	1.06359	5.75908e-20	Endothelial
865	Efr3b	1.75428	6.215e-20	Endothelial
866	Il1r1	2.61964	6.63017e-20	Endothelial
867	Adss	1.01659	7.75878e-20	Endothelial
868	Crlf2	1.71362	8.84749e-20	Endothelial
869	Samd9l	0.949581	1.155e-19	Endothelial
870	Casp4	0.985737	1.20838e-19	Endothelial
871	Rasal2	0.953419	1.23768e-19	Endothelial
872	Amotl1	1.11386	1.25976e-19	Endothelial
873	Akap12	0.625469	1.42157e-19	Endothelial
874	Csf2rb2	4.79207	1.68808e-19	Endothelial
875	Atf3	0.685167	1.70474e-19	Endothelial
876	Arhgef5	3.89225	1.75475e-19	Endothelial
877	Tal1	6.00226	1.84513e-19	Endothelial
878	Erg	7.44877	2.00524e-19	Endothelial
879	Serbp1	0.454646	2.03778e-19	Endothelial
880	Mrrf	1.57581	2.19903e-19	Endothelial
881	Plcg1	1.90948	2.27786e-19	Endothelial
882	Apobec3	1.96176	2.49161e-19	Endothelial
883	Hlx	3.35308	2.64011e-19	Endothelial
884	Kti12	1.99786	2.81261e-19	Endothelial
885	Sde2	0.788228	3.02885e-19	Endothelial
886	Grb10	1.01248	3.0774e-19	Endothelial
887	Tap2	0.694321	3.14294e-19	Endothelial
888	Il13ra1	2.32237	3.14401e-19	Endothelial
889	Vps36	0.885589	5.44613e-19	Endothelial
890	Ccnt1	0.849381	5.93677e-19	Endothelial
891	Diaph2	0.874544	6.42115e-19	Endothelial
892	Ephb4	2.76782	6.71529e-19	Endothelial
893	Smad1	1.51456	6.79866e-19	Endothelial
894	Notch1	0.600039	8.20444e-19	Endothelial
895	Yrdc	1.43357	8.51252e-19	Endothelial
896	Klk8	2.76121	8.51304e-19	Endothelial
897	Xbp1	0.716513	8.609e-19	Endothelial
898	Hoxb4	1.66042	9.26189e-19	Endothelial
899	Dusp23	1.62675	9.96879e-19	Endothelial
900	Kdm6b	0.800686	1.03956e-18	Endothelial
901	Sncaip	5.83819	1.2596e-18	Endothelial
902	Fyn	0.856867	1.42915e-18	Endothelial
903	Col13a1	6.74375	1.82353e-18	Endothelial
904	Bcar1	1.80442	1.84691e-18	Endothelial
905	Fundc2	0.70647	1.87157e-18	Endothelial
906	Sult1a1	0.994858	1.99091e-18	Endothelial
907	Gm11730	7.55844	2.28425e-18	Endothelial
908	Phactr4	1.39681	2.32708e-18	Endothelial
909	Rtl8b	1.13041	2.36337e-18	Endothelial
910	G3bp1	0.66612	2.36352e-18	Endothelial
911	Tcf15	4.87019	2.50619e-18	Endothelial
912	Elf2	0.871742	2.56346e-18	Endothelial
913	Nod1	1.59844	2.72786e-18	Endothelial
914	Anxa11	0.937898	2.96661e-18	Endothelial
915	Fbxw2	0.74689	3.11362e-18	Endothelial
916	Ica1	2.79193	3.31099e-18	Endothelial
917	Eva1a	2.66137	3.32394e-18	Endothelial
918	Midn	1.37147	3.47126e-18	Endothelial
919	Dtd1	0.977742	3.58967e-18	Endothelial
920	Ppp3cc	2.45571	3.90209e-18	Endothelial
921	Ccdc85a	5.54301	4.03005e-18	Endothelial
922	Snrpb	0.487276	4.33979e-18	Endothelial
923	Stap2	7.62523	4.80968e-18	Endothelial
924	Arhgef12	0.57346	4.84456e-18	Endothelial
925	Bcr	1.36669	4.93371e-18	Endothelial
926	Hlf	2.04247	5.3349e-18	Endothelial
927	2010111I01Rik	0.59069	7.14873e-18	Endothelial
928	Rock1	0.562033	7.24306e-18	Endothelial
929	Pde12	1.72357	7.58915e-18	Endothelial
930	Arhgap18	1.69484	7.63119e-18	Endothelial
931	Arl2bp	0.75196	8.94424e-18	Endothelial
932	Diaph1	1.36778	1.04369e-17	Endothelial
933	Zfp36	0.618649	1.37977e-17	Endothelial
934	Mitd1	1.16524	1.41286e-17	Endothelial
935	B4galt1	1.43705	1.53357e-17	Endothelial
936	Ptgis	2.3413	2.00557e-17	Endothelial
937	Dennd3	4.14328	2.01952e-17	Endothelial
938	Uqcrb	0.441233	2.14281e-17	Endothelial
939	Sfpq	0.571334	2.16184e-17	Endothelial
940	Thsd7a	1.14673	2.29238e-17	Endothelial
941	Lrrc49	1.8567	2.32915e-17	Endothelial
942	Dynll1	0.382874	2.444e-17	Endothelial
943	Smarca2	0.774399	2.70547e-17	Endothelial
944	Cct7	0.47789	2.73712e-17	Endothelial
945	Mertk	1.51699	2.85756e-17	Endothelial
946	Gpr146	1.53848	2.86571e-17	Endothelial
947	Gpr4	6.04279	3.59806e-17	Endothelial
948	Gm26917	0.484725	3.61308e-17	Endothelial
949	Pdcl3	0.713737	4.96525e-17	Endothelial
950	Tmem44	2.69973	5.09812e-17	Endothelial
951	Trip10	1.26052	5.35813e-17	Endothelial
952	Pnpla2	0.965455	5.36379e-17	Endothelial
953	Fubp1	0.593098	6.1734e-17	Endothelial
954	Ptpn12	0.730261	6.52631e-17	Endothelial
955	St6galnac3	4.32419	8.1482e-17	Endothelial
956	Rpl27-ps3	1.37777	9.15652e-17	Endothelial
957	Ctgf	1.17583	9.78075e-17	Endothelial
958	Zfand5	0.560371	1.06424e-16	Endothelial
959	Spop	0.528533	1.1786e-16	Endothelial
960	Rapgef1	1.53448	1.21842e-16	Endothelial
961	Lama5	3.28194	1.26753e-16	Endothelial
962	Tbc1d2b	2.06642	1.32997e-16	Endothelial
963	Mbd2	0.602351	1.77427e-16	Endothelial
964	Eif1a	0.732897	1.87458e-16	Endothelial
965	Stc1	7.54237	2.02254e-16	Endothelial
966	Lyn	1.43275	2.19768e-16	Endothelial
967	Bmp4	3.18237	2.47296e-16	Endothelial
968	Ankrd29	2.48843	2.59512e-16	Endothelial
969	Ccdc12	0.626695	2.92507e-16	Endothelial
970	Mrpl24	0.638839	3.18644e-16	Endothelial
971	Sh2d3c	2.454	3.1903e-16	Endothelial
972	4921524J17Rik	0.838989	3.37934e-16	Endothelial
973	Hacd4	1.07762	3.39488e-16	Endothelial
974	Actr3	0.552885	3.44064e-16	Endothelial
975	Tceal9	0.573228	3.73687e-16	Endothelial
976	Klhl6	3.10827	3.85719e-16	Endothelial
977	Trmt1l	0.949387	4.02287e-16	Endothelial
978	Ass1	1.61536	4.37523e-16	Endothelial
979	Eif3k	0.462087	4.79233e-16	Endothelial
980	Notch4	3.81298	5.13566e-16	Endothelial
981	Gna11	0.575015	6.1063e-16	Endothelial
982	Chd1	0.848724	6.31168e-16	Endothelial
983	Exosc2	1.02076	6.3375e-16	Endothelial
984	Dach1	6.29705	6.87191e-16	Endothelial
985	Pfkl	1.00937	7.01193e-16	Endothelial
986	Rnf213	0.988353	7.28999e-16	Endothelial
987	Nav1	0.537098	7.80595e-16	Endothelial
988	Git2	1.17324	9.09095e-16	Endothelial
989	Nxpe4	4.30049	9.09095e-16	Endothelial
990	Epb41l4aos	1.30705	9.35382e-16	Endothelial
991	Ccdc82	1.01316	9.39457e-16	Endothelial
992	Lsm2	1.00424	1.08422e-15	Endothelial
993	Card19	0.762384	1.37015e-15	Endothelial
994	Egr3	1.07094	1.54793e-15	Endothelial
995	Noct	2.80526	1.81651e-15	Endothelial
996	Gbp3	0.849136	1.81892e-15	Endothelial
997	Nr4a2	0.870835	2.03913e-15	Endothelial
998	March5	0.720613	2.03913e-15	Endothelial
999	Slbp	1.07656	2.12507e-15	Endothelial
1000	Hes1	0.519059	2.31818e-15	Endothelial
1001	Tbx3	2.91317	2.42109e-15	Endothelial
1002	Ddx50	0.522313	2.50146e-15	Endothelial
1003	Ahsa1	0.615727	2.91886e-15	Endothelial
1004	Ptp4a3	1.41292	3.07614e-15	Endothelial
1005	Dazap2	0.647334	3.36254e-15	Endothelial
1006	Sumo1	0.488781	3.36856e-15	Endothelial
1007	Ccdc117	1.43275	3.49295e-15	Endothelial
1008	Cpne8	0.576195	3.93644e-15	Endothelial
1009	Tmem109	0.74836	3.97326e-15	Endothelial
1010	Dnttip2	0.760777	3.98756e-15	Endothelial
1011	Cysltr1	2.79796	4.00759e-15	Endothelial
1012	Cox5a	0.428411	4.23059e-15	Endothelial
1013	Foxf1	6.4607	4.55367e-15	Endothelial
1014	Chic2	0.700643	4.56674e-15	Endothelial
1015	Tbrg1	0.53715	4.624e-15	Endothelial
1016	Exoc6	2.23576	4.6872e-15	Endothelial
1017	2200002D01Rik	2.48059	4.78713e-15	Endothelial
1018	Thsd1	3.96424	5.25867e-15	Endothelial
1019	Arl15	2.43622	6.31316e-15	Endothelial
1020	Gbp5	1.69231	6.43144e-15	Endothelial
1021	Cobll1	1.42822	6.58312e-15	Endothelial
1022	Gapdh	0.333355	7.05899e-15	Endothelial
1023	Banf1	0.756486	7.40323e-15	Endothelial
1024	Phldb2	1.30524	7.62688e-15	Endothelial
1025	Enpep	3.22587	8.36899e-15	Endothelial
1026	Irf1	0.659733	9.17657e-15	Endothelial
1027	Npnt	2.45841	9.54562e-15	Endothelial
1028	Golm1	1.78967	1.04386e-14	Endothelial
1029	Dusp2	3.98333	1.07078e-14	Endothelial
1030	Ctbp2	1.02003	1.10076e-14	Endothelial
1031	Helz2	2.01306	1.20671e-14	Endothelial
1032	Dhx15	0.6772	1.22921e-14	Endothelial
1033	Hoxd9	6.70647	1.2499e-14	Endothelial
1034	Tfpi	1.64356	1.25944e-14	Endothelial
1035	Leprot	0.694708	1.29514e-14	Endothelial
1036	Hpcal1	0.952634	1.34265e-14	Endothelial
1037	Ahsa2	0.8687	1.39809e-14	Endothelial
1038	Shb	2.2508	1.41536e-14	Endothelial
1039	Abi3	2.82774	1.45002e-14	Endothelial
1040	Pcdh1	1.12059	1.51954e-14	Endothelial
1041	Ctsc	0.443226	1.67195e-14	Endothelial
1042	Tmem184b	1.57323	1.74836e-14	Endothelial
1043	Bsg	0.405838	2.10739e-14	Endothelial
1044	Pnrc2	0.973502	2.11704e-14	Endothelial
1045	Eif2ak2	1.07347	2.36775e-14	Endothelial
1046	Nfil3	1.4848	2.94791e-14	Endothelial
1047	Jup	1.03664	3.012e-14	Endothelial
1048	Arhgap17	0.776859	3.02094e-14	Endothelial
1049	Irf2	0.638631	3.08585e-14	Endothelial
1050	Myo10	0.721431	3.26486e-14	Endothelial
1051	4930523C07Rik	0.814411	3.40816e-14	Endothelial
1052	Uvrag	1.01641	3.44389e-14	Endothelial
1053	Tmem173	2.71083	3.92501e-14	Endothelial
1054	Gpcpd1	1.15945	3.94388e-14	Endothelial
1055	Csnk1a1	0.392535	3.99337e-14	Endothelial
1056	Hivep2	0.677957	4.24548e-14	Endothelial
1057	Timm10b	0.645787	4.87414e-14	Endothelial
1058	Mtx2	0.945906	5.08232e-14	Endothelial
1059	Nrbp1	0.83067	5.47845e-14	Endothelial
1060	Sema3f	4.341	5.73549e-14	Endothelial
1061	Lcn2	11.7568	6.25337e-14	Endothelial
1062	Kmt2e	0.453924	6.39286e-14	Endothelial
1063	Myd88	0.977222	6.57662e-14	Endothelial
1064	Zdhhc18	1.10323	7.1319e-14	Endothelial
1065	S100a10	0.406791	7.18768e-14	Endothelial
1066	Smchd1	0.610714	7.80791e-14	Endothelial
1067	Meox1	0.840788	8.41411e-14	Endothelial
1068	Nbeal1	0.558743	8.59314e-14	Endothelial
1069	Card10	2.13101	8.81555e-14	Endothelial
1070	Pim1	0.852935	8.88487e-14	Endothelial
1071	Irx3	6.49615	9.11913e-14	Endothelial
1072	Ppm1f	1.87574	1.08571e-13	Endothelial
1073	Nhsl2	2.06398	1.27325e-13	Endothelial
1074	Ost4	0.46328	1.35351e-13	Endothelial
1075	Plk3	2.15276	1.37436e-13	Endothelial
1076	Mapk12	1.67345	1.74838e-13	Endothelial
1077	Eloc	0.463326	1.81649e-13	Endothelial
1078	Meis2	2.32952	2.04776e-13	Endothelial
1079	Eva1b	0.709816	2.15338e-13	Endothelial
1080	Rasd1	2.83482	2.18802e-13	Endothelial
1081	Frmd4b	1.32586	2.29133e-13	Endothelial
1082	Atp2b4	0.692121	2.80636e-13	Endothelial
1083	Hyal2	2.45442	2.9285e-13	Endothelial
1084	Nav2	1.42749	2.93068e-13	Endothelial
1085	Ypel2	2.06925	2.96739e-13	Endothelial
1086	Jarid2	1.15902	3.04398e-13	Endothelial
1087	Cdk11b	0.603509	3.06828e-13	Endothelial
1088	Cebpz	0.586923	3.3092e-13	Endothelial
1089	Ar	1.45455	3.41472e-13	Endothelial
1090	Trmt10c	1.41692	3.47722e-13	Endothelial
1091	Meox2	0.850354	3.55492e-13	Endothelial
1092	Taf7	0.843129	3.70779e-13	Endothelial
1093	Arhgap10	1.27648	3.81548e-13	Endothelial
1094	Arhgef2	1.09337	3.83117e-13	Endothelial
1095	Bcl2l1	0.924476	3.85536e-13	Endothelial
1096	Strn3	0.567054	4.10884e-13	Endothelial
1097	H2-M3	0.992512	4.45575e-13	Endothelial
1098	Lrp5	1.97404	4.52839e-13	Endothelial
1099	Spry4	1.49894	4.58133e-13	Endothelial
1100	Sybu	2.23094	4.6953e-13	Endothelial
1101	Ppm1g	0.773266	5.02931e-13	Endothelial
1102	Bik	3.93904	5.17111e-13	Endothelial
1103	AL732506.1	1.44227	5.73157e-13	Endothelial
1104	Chst2	2.71213	6.09587e-13	Endothelial
1105	Sh3rf1	2.96333	6.3419e-13	Endothelial
1106	Dok4	2.9943	6.58636e-13	Endothelial
1107	Usp25	0.863818	6.77254e-13	Endothelial
1108	Adarb1	1.5368	6.777e-13	Endothelial
1109	Ppp1r18	0.901874	7.93108e-13	Endothelial
1110	Sh3bgrl3	0.351793	8.16839e-13	Endothelial
1111	Foxn3	0.611829	8.48295e-13	Endothelial
1112	2810403A07Rik	1.07286	9.16402e-13	Endothelial
1113	Tmem238	1.35111	9.39862e-13	Endothelial
1114	Hipk1	0.601066	9.53058e-13	Endothelial
1115	Gsdmd	1.56936	9.56874e-13	Endothelial
1116	Tnfaip2	3.47824	1.01441e-12	Endothelial
1117	Pgm1	1.87387	1.0223e-12	Endothelial
1118	Sema6b	3.50698	1.1612e-12	Endothelial
1119	Mospd1	1.63361	1.3367e-12	Endothelial
1120	Mef2d	1.03946	1.34386e-12	Endothelial
1121	Pik3r3	2.58578	1.36686e-12	Endothelial
1122	Stim1	0.717396	1.52805e-12	Endothelial
1123	Trpv4	3.5699	1.58445e-12	Endothelial
1124	Plp2	0.968444	1.65234e-12	Endothelial
1125	Abhd2	1.35074	1.84156e-12	Endothelial
1126	Dll1	6.59521	1.86033e-12	Endothelial
1127	Tsc22d3	0.505294	1.9705e-12	Endothelial
1128	Baiap2	0.700378	2.31728e-12	Endothelial
1129	Stag1	0.609729	2.54744e-12	Endothelial
1130	Rbm7	0.708687	2.62618e-12	Endothelial
1131	Bnip3l	0.432325	2.68059e-12	Endothelial
1132	Tmem123	1.07913	2.78716e-12	Endothelial
1133	Clta	0.332595	2.8062e-12	Endothelial
1134	Eif4g2	0.377946	2.81682e-12	Endothelial
1135	Irgm1	0.954746	2.88454e-12	Endothelial
1136	Ly96	1.6956	2.90638e-12	Endothelial
1137	Sh3bp5	0.698135	3.04572e-12	Endothelial
1138	Lama3	5.16639	3.18786e-12	Endothelial
1139	Lhx6	6.29255	3.20741e-12	Endothelial
1140	Ankrd13a	1.32308	3.45502e-12	Endothelial
1141	Arid4a	0.662363	3.52895e-12	Endothelial
1142	Ccnl2	0.522589	3.66009e-12	Endothelial
1143	Irf9	0.801582	3.84432e-12	Endothelial
1144	Nras	0.710042	3.98721e-12	Endothelial
1145	Atp1a1	0.374825	4.22065e-12	Endothelial
1146	Rftn1	1.7434	4.22118e-12	Endothelial
1147	Eif4a1	0.401365	4.22607e-12	Endothelial
1148	Pam	0.517474	4.25792e-12	Endothelial
1149	Isg15	0.414403	4.26752e-12	Endothelial
1150	Mknk2	1.03696	4.73275e-12	Endothelial
1151	Synm	1.13962	4.78855e-12	Endothelial
1152	Cct2	0.45878	5.07244e-12	Endothelial
1153	Arid4b	0.503275	5.25501e-12	Endothelial
1154	Tns1	0.506817	5.28539e-12	Endothelial
1155	Jag1	1.24151	5.76813e-12	Endothelial
1156	Chordc1	0.570403	6.42526e-12	Endothelial
1157	Hmgn5	1.07305	6.44614e-12	Endothelial
1158	Qsox1	1.14972	6.60334e-12	Endothelial
1159	Epha2	2.63646	6.7394e-12	Endothelial
1160	Rbm8a	0.509681	7.39025e-12	Endothelial
1161	Fam117b	1.08795	7.51262e-12	Endothelial
1162	Hmg20b	0.552425	7.79796e-12	Endothelial
1163	Ifi211	1.90106	7.88709e-12	Endothelial
1164	Sos1	1.19899	8.50762e-12	Endothelial
1165	Rnf167	0.892025	8.52381e-12	Endothelial
1166	Impdh1	2.04675	8.79086e-12	Endothelial
1167	Ppid	0.585629	9.32051e-12	Endothelial
1168	Dysf	2.02352	9.60255e-12	Endothelial
1169	Zdhhc20	0.836683	1.0963e-11	Endothelial
1170	Kcmf1	0.593424	1.15078e-11	Endothelial
1171	Cda	1.55342	1.16823e-11	Endothelial
1172	Stim2	0.885864	1.23058e-11	Endothelial
1173	Cyp4b1	4.09359	1.25118e-11	Endothelial
1174	Myrip	3.04036	1.46197e-11	Endothelial
1175	Hnrnpa3	0.39786	1.52999e-11	Endothelial
1176	Caskin2	0.752846	1.54495e-11	Endothelial
1177	Chn2	3.16245	1.67836e-11	Endothelial
1178	Dgkh	0.661197	1.71792e-11	Endothelial
1179	Polr2a	0.752886	1.71955e-11	Endothelial
1180	Clk1	0.436559	1.78249e-11	Endothelial
1181	Erh	0.657944	1.83539e-11	Endothelial
1182	Nrros	1.74695	1.83539e-11	Endothelial
1183	Higd1b	3.18929	1.94206e-11	Endothelial
1184	Slc26a10	5.84554	2.21353e-11	Endothelial
1185	Abcc4	2.63273	2.27957e-11	Endothelial
1186	Dstyk	0.82788	2.37085e-11	Endothelial
1187	Map3k11	1.42499	2.46128e-11	Endothelial
1188	Taok2	0.887727	2.4736e-11	Endothelial
1189	Ppp1cb	0.496407	2.58115e-11	Endothelial
1190	Pitpnm2	1.47567	2.67191e-11	Endothelial
1191	Baz2b	0.551115	2.68539e-11	Endothelial
1192	Zhx3	1.45115	2.76795e-11	Endothelial
1193	Rbbp6	0.488813	2.7925e-11	Endothelial
1194	Plaur	3.88584	2.90589e-11	Endothelial
1195	Enpp4	1.00195	3.26739e-11	Endothelial
1196	Hnrnph1	0.427437	3.57943e-11	Endothelial
1197	Rab13	0.687556	3.65578e-11	Endothelial
1198	Nufip2	0.506679	3.90743e-11	Endothelial
1199	Fat4	3.32838	3.97773e-11	Endothelial
1200	Coq10b	0.537524	4.00873e-11	Endothelial
1201	Stx12	0.566141	4.26132e-11	Endothelial
1202	Slc2a1	0.905502	4.78345e-11	Endothelial
1203	Selenoh	0.677323	4.92866e-11	Endothelial
1204	Slc7a1	1.53101	5.32614e-11	Endothelial
1205	Exoc5	0.807648	5.9578e-11	Endothelial
1206	Cnksr3	1.72176	5.9904e-11	Endothelial
1207	Phc2	0.649502	6.96793e-11	Endothelial
1208	Cd320	1.24373	7.14927e-11	Endothelial
1209	Mfsd2a	1.511	7.27847e-11	Endothelial
1210	Pllp	2.64254	7.6138e-11	Endothelial
1211	Fam241a	1.85663	7.66397e-11	Endothelial
1212	Abhd17a	0.569399	8.3087e-11	Endothelial
1213	Tomm7	0.35712	8.44941e-11	Endothelial
1214	Lgals9	0.855693	8.51714e-11	Endothelial
1215	Oaz2	0.647292	8.72178e-11	Endothelial
1216	Stip1	0.542867	9.15509e-11	Endothelial
1217	Slain2	0.802514	9.42508e-11	Endothelial
1218	Txnrd1	0.703283	9.88088e-11	Endothelial
1219	Rfk	0.930867	1.0073e-10	Endothelial
1220	Dram2	1.16146	1.03244e-10	Endothelial
1221	Ehbp1l1	0.965601	1.10214e-10	Endothelial
1222	Col4a1	0.420427	1.19218e-10	Endothelial
1223	Sp140	1.65039	1.22297e-10	Endothelial
1224	Stox2	0.679322	1.28501e-10	Endothelial
1225	Actn1	0.708438	1.29972e-10	Endothelial
1226	Trnau1ap	0.752347	1.37388e-10	Endothelial
1227	Ndufa4l2	2.19059	1.39031e-10	Endothelial
1228	Itga1	0.458788	1.408e-10	Endothelial
1229	Rbms1	0.3935	1.44093e-10	Endothelial
1230	Tpp2	0.756535	1.46171e-10	Endothelial
1231	Hmbox1	0.796175	1.5131e-10	Endothelial
1232	Ssbp4	0.600456	1.52102e-10	Endothelial
1233	Acsl5	1.08431	1.522e-10	Endothelial
1234	Trim24	0.873468	1.62683e-10	Endothelial
1235	Ppp1r11	0.458496	1.63783e-10	Endothelial
1236	Crybb3	3.31425	1.68267e-10	Endothelial
1237	Hnrnpa2b1	0.338091	1.70108e-10	Endothelial
1238	Gatad2a	0.930616	1.8499e-10	Endothelial
1239	Als2cl	4.96232	1.90861e-10	Endothelial
1240	Smc4	0.996492	2.09423e-10	Endothelial
1241	Cdv3	0.50946	2.09433e-10	Endothelial
1242	Gm9493	1.22463	2.14305e-10	Endothelial
1243	Prickle3	2.36505	2.19442e-10	Endothelial
1244	Gng5	0.341777	2.22423e-10	Endothelial
1245	Map4k3	1.20968	2.4495e-10	Endothelial
1246	Inpp1	0.865386	2.68001e-10	Endothelial
1247	Pdcd10	0.413642	2.70903e-10	Endothelial
1248	4930578C19Rik	9.62835	2.93988e-10	Endothelial
1249	Mplkip	0.741566	3.13875e-10	Endothelial
1250	Ak3	0.658628	3.2507e-10	Endothelial
1251	Kpna4	0.52103	3.31165e-10	Endothelial
1252	Chmp3	0.482172	3.37464e-10	Endothelial
1253	Sppl2a	0.615466	3.41936e-10	Endothelial
1254	Atp5j	0.335026	3.43695e-10	Endothelial
1255	Synpo	1.0233	3.49851e-10	Endothelial
1256	Anp32b	0.404194	3.59217e-10	Endothelial
1257	Enc1	3.06954	3.75779e-10	Endothelial
1258	Cited2	0.593855	3.76813e-10	Endothelial
1259	Rasa4	2.01144	3.8161e-10	Endothelial
1260	Snrnp48	0.501929	3.84062e-10	Endothelial
1261	Nol7	0.398422	4.60933e-10	Endothelial
1262	Ubb	0.19916	4.88676e-10	Endothelial
1263	Znfx1	0.928925	4.95996e-10	Endothelial
1264	Rnaset2b	1.05582	5.05012e-10	Endothelial
1265	Dnajb4	0.568906	5.19094e-10	Endothelial
1266	Plcb4	0.460632	5.52654e-10	Endothelial
1267	Gtf2a2	0.488737	5.54859e-10	Endothelial
1268	Pola2	2.1538	5.54859e-10	Endothelial
1269	Hnrnpa0	0.390544	5.84344e-10	Endothelial
1270	0610010K14Rik	0.978466	6.0966e-10	Endothelial
1271	Ndufa4	0.330927	6.58028e-10	Endothelial
1272	Foxc1	1.70364	7.11933e-10	Endothelial
1273	Sf3b1	0.339369	7.13716e-10	Endothelial
1274	Snrpf	0.409176	7.1647e-10	Endothelial
1275	Tcf7l2	0.761336	7.6342e-10	Endothelial
1276	Tmem30a	0.408972	7.94351e-10	Endothelial
1277	Ncl	0.349327	8.02702e-10	Endothelial
1278	Itsn2	0.640214	8.2041e-10	Endothelial
1279	Tbc1d8	2.28576	8.32299e-10	Endothelial
1280	Man1a	1.04002	9.04772e-10	Endothelial
1281	Gar1	0.878426	9.08101e-10	Endothelial
1282	Klhl4	5.00909	9.23909e-10	Endothelial
1283	Rab5c	0.448377	9.33784e-10	Endothelial
1284	Wfdc2	11.536	9.45216e-10	Endothelial
1285	Fam84b	4.09184	9.52027e-10	Endothelial
1286	Klf10	1.27661	9.62116e-10	Endothelial
1287	Plekho1	0.657113	9.68672e-10	Endothelial
1288	Gm26632	2.76353	1.02386e-09	Endothelial
1289	Arhgef3	0.919568	1.09648e-09	Endothelial
1290	Rictor	0.758094	1.10323e-09	Endothelial
1291	Wdr89	0.791237	1.1166e-09	Endothelial
1292	Ahr	0.504024	1.13348e-09	Endothelial
1293	Mxd4	0.44526	1.16679e-09	Endothelial
1294	Ddx54	0.752163	1.22057e-09	Endothelial
1295	Sugt1	0.413629	1.2258e-09	Endothelial
1296	Cox4i2	2.61156	1.28245e-09	Endothelial
1297	Palm	0.724081	1.36981e-09	Endothelial
1298	Cpeb4	0.728078	1.40824e-09	Endothelial
1299	Atp2b1	0.338354	1.49455e-09	Endothelial
1300	Tob1	0.696081	1.53455e-09	Endothelial
1301	Prrc2c	0.34964	1.53747e-09	Endothelial
1302	Ywhah	0.325135	1.6694e-09	Endothelial
1303	Cnbp	0.315664	1.85541e-09	Endothelial
1304	Wsb2	0.611464	1.89099e-09	Endothelial
1305	Gucy1a1	0.885624	2.029e-09	Endothelial
1306	6430548M08Rik	1.34687	2.03995e-09	Endothelial
1307	Tcp1	0.479493	2.04145e-09	Endothelial
1308	Ddx23	0.855647	2.0599e-09	Endothelial
1309	Btnl9	7.88761	2.06613e-09	Endothelial
1310	Ripk1	0.641425	2.17212e-09	Endothelial
1311	AI839979	3.01143	2.43464e-09	Endothelial
1312	Bcl10	0.565764	2.45151e-09	Endothelial
1313	Eno1	0.465525	2.55847e-09	Endothelial
1314	Ddit4	0.679657	2.56318e-09	Endothelial
1315	Baz1a	1.47325	2.56952e-09	Endothelial
1316	Polr2c	0.447891	2.58818e-09	Endothelial
1317	Ift172	1.3717	2.62757e-09	Endothelial
1318	Rasl11a	1.60816	2.81395e-09	Endothelial
1319	Eps8	0.81476	2.81395e-09	Endothelial
1320	Cdipt	0.642639	3.04501e-09	Endothelial
1321	Ube2i	0.418988	3.22381e-09	Endothelial
1322	Alox12	5.32508	3.32954e-09	Endothelial
1323	Ablim3	2.59102	3.53519e-09	Endothelial
1324	Atf4	0.384732	3.58294e-09	Endothelial
1325	Magix	6.23609	3.65442e-09	Endothelial
1326	Wdr26	0.504914	3.92278e-09	Endothelial
1327	Elovl7	2.17123	3.93514e-09	Endothelial
1328	Ifi204	1.2035	4.19968e-09	Endothelial
1329	Tomm20	0.357224	4.25059e-09	Endothelial
1330	Casz1	1.14932	4.36287e-09	Endothelial
1331	Cyr61	0.418335	4.41245e-09	Endothelial
1332	Sned1	0.990148	4.47504e-09	Endothelial
1333	Ctnnd1	0.641353	4.52869e-09	Endothelial
1334	Ppp4c	0.802604	4.69128e-09	Endothelial
1335	Ssu72	0.464608	4.96163e-09	Endothelial
1336	Hipk3	0.721802	5.16497e-09	Endothelial
1337	Marf1	0.564526	5.39488e-09	Endothelial
1338	Nfkbiz	0.607525	5.39488e-09	Endothelial
1339	Cbx1	0.421375	5.54897e-09	Endothelial
1340	Eif5	0.323156	5.77744e-09	Endothelial
1341	Emg1	0.53103	5.88384e-09	Endothelial
1342	Zfand2a	1.57879	6.13343e-09	Endothelial
1343	Arf6	0.869837	6.40599e-09	Endothelial
1344	Csf1	0.896751	6.59516e-09	Endothelial
1345	Cenpt	2.27714	7.13065e-09	Endothelial
1346	Rgl2	0.804133	7.23613e-09	Endothelial
1347	Zfp46	1.90719	7.24025e-09	Endothelial
1348	Myo1d	2.57703	7.25634e-09	Endothelial
1349	Bst1	5.04773	7.35916e-09	Endothelial
1350	Fam174b	1.71474	7.3656e-09	Endothelial
1351	Cltb	0.362719	7.52147e-09	Endothelial
1352	Trp53i11	1.75204	8.22167e-09	Endothelial
1353	Chmp5	0.377614	8.25686e-09	Endothelial
1354	Papola	0.452621	8.33776e-09	Endothelial
1355	Foxo1	0.455192	8.44122e-09	Endothelial
1356	Eif3m	0.414492	8.46597e-09	Endothelial
1357	Fam60a	2.1384	8.50827e-09	Endothelial
1358	Pfkfb3	1.16334	8.56201e-09	Endothelial
1359	Pnrc1	0.337756	8.67729e-09	Endothelial
1360	Ankrd11	0.346127	8.69868e-09	Endothelial
1361	Sft2d1	0.708626	8.89882e-09	Endothelial
1362	Uspl1	0.856007	8.89882e-09	Endothelial
1363	Bbx	0.582327	9.00826e-09	Endothelial
1364	Itpripl1	2.21483	1.06662e-08	Endothelial
1365	Rpl9-ps6	1.54731	1.08744e-08	Endothelial
1366	Etv6	1.19172	1.09848e-08	Endothelial
1367	Fgd6	2.13164	1.14322e-08	Endothelial
1368	Nup98	0.667396	1.14479e-08	Endothelial
1369	Mob2	0.66084	1.14532e-08	Endothelial
1370	Tifa	1.51107	1.14532e-08	Endothelial
1371	Ube2q1	0.618065	1.15841e-08	Endothelial
1372	Gadd45b	0.349284	1.16859e-08	Endothelial
1373	Znrd1	0.509355	1.17232e-08	Endothelial
1374	Oser1	0.702648	1.25921e-08	Endothelial
1375	Ywhab	0.303736	1.26162e-08	Endothelial
1376	Rlim	0.609603	1.28245e-08	Endothelial
1377	Sgpp2	1.36884	1.44765e-08	Endothelial
1378	Lsm8	0.591801	1.53176e-08	Endothelial
1379	Mier1	0.427908	1.54729e-08	Endothelial
1380	Jmjd6	0.56768	1.5498e-08	Endothelial
1381	Ubn1	0.415299	1.56302e-08	Endothelial
1382	Arhgap27	3.16408	1.75002e-08	Endothelial
1383	N4bp1	0.663372	1.82011e-08	Endothelial
1384	Fxr1	0.379365	1.88187e-08	Endothelial
1385	Eif3a	0.358116	1.88286e-08	Endothelial
1386	Brd4	0.437436	1.88712e-08	Endothelial
1387	Adgre5	1.35317	1.94552e-08	Endothelial
1388	Apol9a	3.84301	2.01363e-08	Endothelial
1389	Lyar	0.713673	2.05117e-08	Endothelial
1390	Snai2	3.89142	2.11128e-08	Endothelial
1391	Lsr	4.38478	2.11941e-08	Endothelial
1392	Mafk	0.767746	2.18682e-08	Endothelial
1393	Med13l	0.590235	2.26007e-08	Endothelial
1394	Pak2	0.351764	2.33175e-08	Endothelial
1395	Sbds	0.368073	2.36724e-08	Endothelial
1396	Snhg12	0.495633	2.39189e-08	Endothelial
1397	Ripply3	5.53589	2.3942e-08	Endothelial
1398	Cast	0.457154	2.4471e-08	Endothelial
1399	Gm10073	0.74528	2.4662e-08	Endothelial
1400	Smg6	0.597923	2.69587e-08	Endothelial
1401	Fam53b	1.32818	2.78711e-08	Endothelial
1402	Wipf3	4.93455	2.80659e-08	Endothelial
1403	Rasa1	0.617637	2.91566e-08	Endothelial
1404	Kctd17	0.79259	3.08458e-08	Endothelial
1405	Plekha3	0.881272	3.11054e-08	Endothelial
1406	Zfpm1	1.69929	3.15383e-08	Endothelial
1407	Hnrnpc	0.356636	3.15625e-08	Endothelial
1408	Sorbs3	1.48653	3.25603e-08	Endothelial
1409	Scn1b	0.630146	3.31004e-08	Endothelial
1410	Sri	0.365959	3.3265e-08	Endothelial
1411	Slc27a3	2.95321	3.39785e-08	Endothelial
1412	4833403J16Rik	7.33289	3.53047e-08	Endothelial
1413	Tgif1	1.0491	3.59486e-08	Endothelial
1414	Rtraf	0.309429	3.59564e-08	Endothelial
1415	Gpd2	0.802852	3.66479e-08	Endothelial
1416	Hmgb2	0.485882	3.71755e-08	Endothelial
1417	Spaca6	1.10981	3.77615e-08	Endothelial
1418	Myc	1.13205	3.97203e-08	Endothelial
1419	Dnajb9	0.453649	4.13914e-08	Endothelial
1420	Set	0.339907	4.166e-08	Endothelial
1421	Ap3s1	0.63744	4.18064e-08	Endothelial
1422	Usp34	0.391365	4.19405e-08	Endothelial
1423	Yme1l1	0.462174	4.21167e-08	Endothelial
1424	Zcchc14	0.80742	4.40407e-08	Endothelial
1425	Eml4	0.879147	4.45776e-08	Endothelial
1426	Jak2	1.05746	4.46637e-08	Endothelial
1427	Dnajb6	0.339205	4.48874e-08	Endothelial
1428	Nasp	0.857473	4.51174e-08	Endothelial
1429	Eif4a2	0.325573	4.54044e-08	Endothelial
1430	Rab1a	0.456685	4.55803e-08	Endothelial
1431	Setd5	0.438283	4.5883e-08	Endothelial
1432	Nr3c1	0.361698	4.88024e-08	Endothelial
1433	Tmem128	0.580126	5.03511e-08	Endothelial
1434	Aimp1	0.383893	5.22383e-08	Endothelial
1435	Myzap	4.02867	5.66221e-08	Endothelial
1436	Tmbim4	0.40075	5.67249e-08	Endothelial
1437	Tyms	1.52019	5.9742e-08	Endothelial
1438	Flt4	7.70516	6.12161e-08	Endothelial
1439	Wdr37	0.881086	6.41774e-08	Endothelial
1440	Ube2g2	0.812856	6.87128e-08	Endothelial
1441	Dgkz	0.597798	6.9744e-08	Endothelial
1442	Cycs	0.368512	7.22438e-08	Endothelial
1443	Taf10	0.377379	7.24049e-08	Endothelial
1444	Fam171a1	0.907513	7.40785e-08	Endothelial
1445	Srsf2	0.352335	7.66861e-08	Endothelial
1446	Ginm1	0.552951	7.89341e-08	Endothelial
1447	Mcts1	0.548232	7.90405e-08	Endothelial
1448	Tril	1.10994	8.10012e-08	Endothelial
1449	H2-Aa	-0.207538	8.21045e-08	Endothelial
1450	Nr1d1	1.02894	8.41986e-08	Endothelial
1451	Vamp3	0.476303	8.43518e-08	Endothelial
1452	Gem	0.694716	8.56614e-08	Endothelial
1453	Fgfr3	3.7993	8.83543e-08	Endothelial
1454	Wsb1	0.449081	9.33504e-08	Endothelial
1455	Eif2a	0.644711	9.80128e-08	Endothelial
1456	Ssr4	0.31736	1.03392e-07	Endothelial
1457	Fbxl7	1.00051	1.04036e-07	Endothelial
1458	Ano6	0.402334	1.09467e-07	Endothelial
1459	Uqcc3	0.547465	1.10311e-07	Endothelial
1460	Sh2b3	1.46146	1.12968e-07	Endothelial
1461	Prickle1	1.66616	1.17122e-07	Endothelial
1462	Pdia5	2.05226	1.17668e-07	Endothelial
1463	Slc16a2	1.45708	1.18257e-07	Endothelial
1464	Syf2	0.346312	1.1826e-07	Endothelial
1465	Errfi1	0.541531	1.21024e-07	Endothelial
1466	Lsm5	0.504555	1.22463e-07	Endothelial
1467	Gon7	1.10566	1.30087e-07	Endothelial
1468	Bcl3	1.68375	1.34779e-07	Endothelial
1469	Mtmr11	1.65695	1.36515e-07	Endothelial
1470	Ncor1	0.324645	1.40566e-07	Endothelial
1471	Rnaset2a	0.927283	1.51189e-07	Endothelial
1472	Snap23	0.677321	1.5187e-07	Endothelial
1473	Erap1	1.12979	1.68935e-07	Endothelial
1474	Dchs1	3.05994	1.73661e-07	Endothelial
1475	Degs2	5.39168	1.82888e-07	Endothelial
1476	Gm42670	1.97452	1.91317e-07	Endothelial
1477	Csgalnact1	1.42618	2.03798e-07	Endothelial
1478	3222401L13Rik	0.866546	2.11729e-07	Endothelial
1479	E030030I06Rik	4.7452	2.14775e-07	Endothelial
1480	Fam69a	1.12175	2.21218e-07	Endothelial
1481	Nrp2	0.416128	2.32566e-07	Endothelial
1482	Trib1	0.620268	2.33672e-07	Endothelial
1483	Csrnp1	0.592033	2.34682e-07	Endothelial
1484	Hspb8	0.612293	2.35056e-07	Endothelial
1485	Chmp2b	0.445681	2.36855e-07	Endothelial
1486	Mtmr2	0.889127	2.39836e-07	Endothelial
1487	Tpm1	0.341934	2.59898e-07	Endothelial
1488	B230219D22Rik	0.335886	2.6488e-07	Endothelial
1489	Bzw1	0.347259	2.66491e-07	Endothelial
1490	Bptf	0.350156	2.76625e-07	Endothelial
1491	Bend7	1.45382	3.06072e-07	Endothelial
1492	Rnf144a	2.73703	3.09415e-07	Endothelial
1493	Bambi	0.480736	3.12633e-07	Endothelial
1494	Hint3	0.785568	3.14054e-07	Endothelial
1495	Prdm1	2.83549	3.73989e-07	Endothelial
1496	Ccdc28b	0.820925	3.86787e-07	Endothelial
1497	Ppp1r9b	0.659725	3.89162e-07	Endothelial
1498	Cxcl1	0.52485	3.92895e-07	Endothelial
1499	Map3k3	0.989803	4.35714e-07	Endothelial
1500	Rbfox2	0.569682	4.38541e-07	Endothelial
1501	Srpk1	0.462101	4.44697e-07	Endothelial
1502	Arhgap23	0.859854	4.48036e-07	Endothelial
1503	Arrdc4	2.01161	4.48767e-07	Endothelial
1504	Snhg6	0.830038	4.5369e-07	Endothelial
1505	Gm26669	1.09062	4.5554e-07	Endothelial
1506	Anxa2	0.298269	4.56105e-07	Endothelial
1507	Nectin2	1.04069	4.86304e-07	Endothelial
1508	Ep400	0.494305	4.87192e-07	Endothelial
1509	Smad5	0.80983	4.8787e-07	Endothelial
1510	Ddx6	0.350298	4.94413e-07	Endothelial
1511	Igf2r	1.00811	4.99195e-07	Endothelial
1512	Ddx24	0.304634	5.07894e-07	Endothelial
1513	Cdc42ep1	1.38476	5.28762e-07	Endothelial
1514	Ube2g1	0.770586	5.29128e-07	Endothelial
1515	Slc25a25	1.18271	5.35848e-07	Endothelial
1516	Phf20l1	0.391524	5.39168e-07	Endothelial
1517	Slco2b1	0.670999	5.44048e-07	Endothelial
1518	Taf1d	0.426469	5.67667e-07	Endothelial
1519	Hnrnpm	0.350208	5.68653e-07	Endothelial
1520	Tnrc6c	0.333006	5.71089e-07	Endothelial
1521	Psmb1	0.300163	5.78348e-07	Endothelial
1522	Magi1	0.906338	5.81875e-07	Endothelial
1523	Wscd1	6.38309	5.8659e-07	Endothelial
1524	Ier2	0.340467	5.98291e-07	Endothelial
1525	Tmem14c	0.335189	6.00391e-07	Endothelial
1526	Thoc2	0.372504	6.01087e-07	Endothelial
1527	Map3k8	1.12947	6.26837e-07	Endothelial
1528	Vmp1	0.461178	6.28173e-07	Endothelial
1529	Gm28875	1.54885	6.41305e-07	Endothelial
1530	Zfp36l2	0.340962	6.79825e-07	Endothelial
1531	Adamtsl1	1.86073	6.94769e-07	Endothelial
1532	Med4	0.595022	7.11166e-07	Endothelial
1533	Atp8b1	1.25561	7.15649e-07	Endothelial
1534	Stk24	0.698938	7.25399e-07	Endothelial
1535	Glud1	0.366432	7.30419e-07	Endothelial
1536	Ipo7	0.700661	7.36552e-07	Endothelial
1537	Fchsd2	0.982774	7.67856e-07	Endothelial
1538	Srf	0.790726	7.71057e-07	Endothelial
1539	Arid5a	0.638048	7.82682e-07	Endothelial
1540	Sox13	2.026	7.9205e-07	Endothelial
1541	Kif26a	1.51739	7.9205e-07	Endothelial
1542	Sept10	0.989598	7.93587e-07	Endothelial
1543	Furin	0.773641	8.51244e-07	Endothelial
1544	AI467606	3.39946	8.70191e-07	Endothelial
1545	Trp53	0.563837	8.90329e-07	Endothelial
1546	Ggta1	0.706999	9.09294e-07	Endothelial
1547	Plekhg2	0.792492	9.23844e-07	Endothelial
1548	Lamtor5	0.320676	9.77254e-07	Endothelial
1549	Cenpx	0.429736	1.00322e-06	Endothelial
1550	Zfp503	0.689067	1.04617e-06	Endothelial
1551	Snrnp200	0.598152	1.05063e-06	Endothelial
1552	Ythdc1	0.348116	1.05196e-06	Endothelial
1553	Zmym5	0.418266	1.06776e-06	Endothelial
1554	Neurl3	1.76131	1.07158e-06	Endothelial
1555	Trim37	0.767663	1.07249e-06	Endothelial
1556	Siah2	1.22812	1.10237e-06	Endothelial
1557	Sf3b3	0.515255	1.11463e-06	Endothelial
1558	Gbp2	0.416298	1.11877e-06	Endothelial
1559	Tulp4	0.394675	1.1439e-06	Endothelial
1560	Gnai3	0.39315	1.14895e-06	Endothelial
1561	Nudt14	1.42048	1.15802e-06	Endothelial
1562	Gstt2	0.969608	1.17325e-06	Endothelial
1563	Larp1b	0.652147	1.17616e-06	Endothelial
1564	Pcsk7	0.899975	1.18713e-06	Endothelial
1565	Mindy1	0.861027	1.2064e-06	Endothelial
1566	Plekhg5	1.81498	1.2166e-06	Endothelial
1567	Akirin1	0.550643	1.31117e-06	Endothelial
1568	Atxn2l	0.502535	1.40562e-06	Endothelial
1569	Ing2	0.807136	1.4423e-06	Endothelial
1570	C1d	0.41453	1.47351e-06	Endothelial
1571	Ppig	0.337697	1.47713e-06	Endothelial
1572	Psmb10	0.313108	1.50739e-06	Endothelial
1573	Oasl2	0.475727	1.5948e-06	Endothelial
1574	Zcrb1	0.341591	1.61427e-06	Endothelial
1575	B430010I23Rik	1.63212	1.63358e-06	Endothelial
1576	Fut2	5.45839	1.63736e-06	Endothelial
1577	Fut8	0.929541	1.6746e-06	Endothelial
1578	Igbp1	0.570639	1.82707e-06	Endothelial
1579	AC127341.3	1.41184	1.83031e-06	Endothelial
1580	Tob2	0.519947	1.8411e-06	Endothelial
1581	Eif4g1	0.339186	1.943e-06	Endothelial
1582	Tcn2	0.374669	2.01815e-06	Endothelial
1583	Psme2b	2.63363	2.14548e-06	Endothelial
1584	Traf7	0.599717	2.14653e-06	Endothelial
1585	Ifitm1	2.05758	2.14653e-06	Endothelial
1586	Psme2	0.317037	2.2116e-06	Endothelial
1587	Cdkn2aip	0.51621	2.26876e-06	Endothelial
1588	Stat2	0.481976	2.31882e-06	Endothelial
1589	Ints6	0.499566	2.35348e-06	Endothelial
1590	Eif4ebp2	0.756261	2.37993e-06	Endothelial
1591	Rnps1	0.474302	2.38945e-06	Endothelial
1592	Srsf11	0.276623	2.40876e-06	Endothelial
1593	Tlx1	7.89958	2.52379e-06	Endothelial
1594	Klf6	0.305764	2.53112e-06	Endothelial
1595	Smap2	0.514384	2.54918e-06	Endothelial
1596	Atp10a	2.45055	2.70945e-06	Endothelial
1597	Mfsd6	0.573657	2.75558e-06	Endothelial
1598	Rab11fip5	0.963548	2.76175e-06	Endothelial
1599	Des	2.58017	2.79235e-06	Endothelial
1600	Txlna	0.571129	2.82834e-06	Endothelial
1601	Notch3	2.21232	2.83148e-06	Endothelial
1602	Pxk	0.657032	2.87057e-06	Endothelial
1603	Fam114a2	0.505929	2.90459e-06	Endothelial
1604	Csde1	0.338025	2.94988e-06	Endothelial
1605	Tox4	0.431233	2.94988e-06	Endothelial
1606	Atad2	1.05141	2.96747e-06	Endothelial
1607	Llph	0.373334	2.96852e-06	Endothelial
1608	Tuba1c	1.71579	3.13423e-06	Endothelial
1609	Axin2	1.58365	3.1345e-06	Endothelial
1610	Stk19	0.520271	3.13599e-06	Endothelial
1611	Itga3	1.55704	3.16508e-06	Endothelial
1612	Supt16	0.382484	3.31013e-06	Endothelial
1613	Rin3	1.30781	3.33177e-06	Endothelial
1614	Capn2	0.387099	3.33777e-06	Endothelial
1615	Bace2	0.641766	3.37312e-06	Endothelial
1616	Akt1	0.438946	3.38256e-06	Endothelial
1617	Gm8186	0.859428	3.41361e-06	Endothelial
1618	Ralgds	0.543784	3.44047e-06	Endothelial
1619	Pkn1	0.573105	3.44616e-06	Endothelial
1620	Orai1	0.746381	3.65221e-06	Endothelial
1621	Gt(ROSA)26Sor	0.530342	3.79604e-06	Endothelial
1622	Klf13	0.298931	3.79604e-06	Endothelial
1623	Rgs12	1.48629	3.83517e-06	Endothelial
1624	Synj2bp	0.544413	3.87255e-06	Endothelial
1625	Pum2	0.387471	4.06233e-06	Endothelial
1626	Rps12-ps3	1.63551	4.1733e-06	Endothelial
1627	Acot9	0.675107	4.20095e-06	Endothelial
1628	Pan3	0.582074	4.22994e-06	Endothelial
1629	Dnajc8	0.364041	4.26859e-06	Endothelial
1630	Enpp3	5.41528	4.32757e-06	Endothelial
1631	Cgnl1	0.958821	4.52098e-06	Endothelial
1632	Gm17745	4.53532	4.69394e-06	Endothelial
1633	Prpf38a	0.616342	4.75545e-06	Endothelial
1634	Tgtp1	5.5468	4.98575e-06	Endothelial
1635	St8sia6	4.55842	5.02439e-06	Endothelial
1636	Rpl10-ps3	1.10117	5.04497e-06	Endothelial
1637	Zfp521	2.17037	5.07038e-06	Endothelial
1638	C2cd2	1.60859	5.26024e-06	Endothelial
1639	Traf5	1.4427	5.28542e-06	Endothelial
1640	Crtc2	1.04782	5.29403e-06	Endothelial
1641	Phactr2	0.397732	5.47245e-06	Endothelial
1642	Hnrnph2	0.385382	5.51742e-06	Endothelial
1643	Ube2j2	0.496796	5.53575e-06	Endothelial
1644	Dhx9	0.40899	5.59842e-06	Endothelial
1645	Pomp	0.261472	5.65007e-06	Endothelial
1646	Tnfaip3	0.949045	5.81996e-06	Endothelial
1647	Cdk12	0.377846	5.82486e-06	Endothelial
1648	Sp1	0.630146	5.87999e-06	Endothelial
1649	Slc25a30	1.53046	5.9854e-06	Endothelial
1650	Cyp1a1	8.84764	6.3844e-06	Endothelial
1651	Zc3h7a	0.50891	6.52675e-06	Endothelial
1652	S1pr4	5.87409	6.55351e-06	Endothelial
1653	H1f0	0.530074	6.57718e-06	Endothelial
1654	Rnf115	0.618951	7.26667e-06	Endothelial
1655	Sbno1	0.372761	7.46089e-06	Endothelial
1656	Txndc17	0.261037	7.63291e-06	Endothelial
1657	Tsc22d2	0.378326	7.6613e-06	Endothelial
1658	Cmpk1	0.354536	8.32407e-06	Endothelial
1659	Hectd1	0.344354	8.41323e-06	Endothelial
1660	Birc6	0.329303	8.54564e-06	Endothelial
1661	Mbtd1	0.557758	8.68927e-06	Endothelial
1662	Ackr1	2.26677	8.68935e-06	Endothelial
1663	Il3ra	1.68244	8.78619e-06	Endothelial
1664	Mgat2	0.609173	8.79478e-06	Endothelial
1665	Kcnq1ot1	0.208694	9.18429e-06	Endothelial
1666	Ifit1	0.39876	9.30034e-06	Endothelial
1667	Kras	0.392693	9.4866e-06	Endothelial
1668	Gle1	0.781016	9.77382e-06	Endothelial
1669	Akr1c19	7.96396	9.85713e-06	Endothelial
1670	AU020206	1.03871	9.97095e-06	Endothelial
1671	Rheb	0.281093	1.00807e-05	Endothelial
1672	Eed	0.854883	1.01795e-05	Endothelial
1673	Ubfd1	0.654831	1.01977e-05	Endothelial
1674	Agpat4	0.61481	1.043e-05	Endothelial
1675	Gnb4	0.338527	1.06513e-05	Endothelial
1676	Ugcg	0.867611	1.07945e-05	Endothelial
1677	Atp11c	1.37943	1.08413e-05	Endothelial
1678	Pik3c2b	2.20035	1.09926e-05	Endothelial
1679	Dgke	1.60867	1.10765e-05	Endothelial
1680	Adamts4	2.79234	1.11767e-05	Endothelial
1681	Ranbp2	0.44641	1.16786e-05	Endothelial
1682	St3gal1	1.49486	1.17242e-05	Endothelial
1683	Metap2	0.263313	1.1777e-05	Endothelial
1684	Rpf1	0.768455	1.25125e-05	Endothelial
1685	1810013L24Rik	0.6855	1.25659e-05	Endothelial
1686	Tap1	0.463506	1.28576e-05	Endothelial
1687	Tmem176a	0.275337	1.29294e-05	Endothelial
1688	Riok3	0.408165	1.31945e-05	Endothelial
1689	Pgm5	3.85466	1.34245e-05	Endothelial
1690	C130013H08Rik	3.46439	1.3743e-05	Endothelial
1691	Serpinb9	0.948351	1.41578e-05	Endothelial
1692	Irgm2	0.890899	1.43029e-05	Endothelial
1693	Pvr	0.966516	1.44044e-05	Endothelial
1694	Polr2k	0.335353	1.44616e-05	Endothelial
1695	Irf2bpl	0.368637	1.46257e-05	Endothelial
1696	Dnm2	0.440302	1.47971e-05	Endothelial
1697	Topors	0.48106	1.48972e-05	Endothelial
1698	Car7	3.92601	1.49139e-05	Endothelial
1699	Tmem189	0.519156	1.51005e-05	Endothelial
1700	G3bp2	0.296616	1.54793e-05	Endothelial
1701	Cd24a	0.610206	1.55634e-05	Endothelial
1702	Strap	0.318431	1.57847e-05	Endothelial
1703	Ikbkb	0.479734	1.60685e-05	Endothelial
1704	Tmpo	0.432071	1.62213e-05	Endothelial
1705	Mprip	0.285213	1.66332e-05	Endothelial
1706	Lats2	0.470862	1.69924e-05	Endothelial
1707	4930503L19Rik	1.14695	1.73347e-05	Endothelial
1708	Eif6	0.335742	1.73765e-05	Endothelial
1709	Vsig10	1.49792	1.74816e-05	Endothelial
1710	Prr5l	2.87589	1.75932e-05	Endothelial
1711	Brd2	0.279345	1.77294e-05	Endothelial
1712	Aff1	0.747347	1.77294e-05	Endothelial
1713	Hmgb1	0.25293	1.78005e-05	Endothelial
1714	Topbp1	1.04966	1.78974e-05	Endothelial
1715	Mapre1	0.275679	1.80603e-05	Endothelial
1716	Dcun1d5	0.318346	1.84786e-05	Endothelial
1717	Ube2b	0.250987	1.87435e-05	Endothelial
1718	Ces2e	9.26438	1.87632e-05	Endothelial
1719	Gabpb1	1.33927	1.89827e-05	Endothelial
1720	Apol9b	4.27729	1.92071e-05	Endothelial
1721	Srgap2	0.368559	1.96118e-05	Endothelial
1722	Foxn2	0.904482	1.99866e-05	Endothelial
1723	Inpp5d	1.16105	1.99981e-05	Endothelial
1724	Lnx2	3.40425	2.01211e-05	Endothelial
1725	Mapk1ip1l	0.533122	2.02188e-05	Endothelial
1726	Atp2a3	3.41048	2.04233e-05	Endothelial
1727	Ddx58	0.554259	2.09784e-05	Endothelial
1728	Tmem158	1.70003	2.14563e-05	Endothelial
1729	H2-Ab1	-0.497249	2.15921e-05	Endothelial
1730	Gm9889	6.88529	2.18815e-05	Endothelial
1731	Dek	0.279363	2.25244e-05	Endothelial
1732	Utp4	1.28438	2.2986e-05	Endothelial
1733	Endou	2.5669	2.3352e-05	Endothelial
1734	Mcm3	1.49857	2.41537e-05	Endothelial
1735	Gpi1	0.227664	2.4381e-05	Endothelial
1736	Glod4	0.429387	2.44382e-05	Endothelial
1737	Slc35f2	7.68702	2.45727e-05	Endothelial
1738	Zbtb11	0.584853	2.51041e-05	Endothelial
1739	Chst11	2.52255	2.51407e-05	Endothelial
1740	Rbm25	0.258946	2.54338e-05	Endothelial
1741	1700123O20Rik	0.562878	2.60905e-05	Endothelial
1742	Prkx	0.679567	2.61224e-05	Endothelial
1743	Ubl3	0.352437	2.64425e-05	Endothelial
1744	Proser2	1.4587	2.64425e-05	Endothelial
1745	Slfn3	6.88038	2.64718e-05	Endothelial
1746	Tmie	4.9305	2.65246e-05	Endothelial
1747	Hip1r	1.44345	2.69842e-05	Endothelial
1748	Klf3	0.399968	2.72491e-05	Endothelial
1749	Smurf2	0.732802	2.72616e-05	Endothelial
1750	Tmem185b	1.34755	2.73023e-05	Endothelial
1751	Calm2	0.205821	2.82743e-05	Endothelial
1752	Zbtb7a	0.33137	2.89572e-05	Endothelial
1753	Tmem131	0.597726	2.90639e-05	Endothelial
1754	Dph6	0.990439	3.02182e-05	Endothelial
1755	Dnajb1	0.214473	3.11603e-05	Endothelial
1756	Cyb5r1	0.722626	3.16409e-05	Endothelial
1757	Impdh2	0.387489	3.1949e-05	Endothelial
1758	Rtcb	0.33065	3.25472e-05	Endothelial
1759	Gm12216	0.659339	3.53802e-05	Endothelial
1760	Pggt1b	0.913588	3.54171e-05	Endothelial
1761	Ubxn2a	0.426598	3.6316e-05	Endothelial
1762	Cd274	1.84719	3.66204e-05	Endothelial
1763	Chchd7	0.432262	3.74958e-05	Endothelial
1764	Atoh8	3.81463	3.76729e-05	Endothelial
1765	Vsig2	6.8776	3.92935e-05	Endothelial
1766	Usp54	1.51965	3.93253e-05	Endothelial
1767	Erich1	0.698223	3.95921e-05	Endothelial
1768	Srrm1	0.26361	4.07959e-05	Endothelial
1769	Rnf114	0.913394	4.2155e-05	Endothelial
1770	Sparcl1	0.395156	4.2484e-05	Endothelial
1771	Kmt2d	0.51761	4.40677e-05	Endothelial
1772	Slc29a1	0.260225	4.46204e-05	Endothelial
1773	Smarca4	0.42154	4.5302e-05	Endothelial
1774	Trappc6b	0.289467	4.72179e-05	Endothelial
1775	Psma7	0.253229	4.98966e-05	Endothelial
1776	Slc20a1	0.761812	5.082e-05	Endothelial
1777	Tgfb1i1	0.551433	5.14174e-05	Endothelial
1778	Taf11	0.484301	5.191e-05	Endothelial
1779	Gm13056	4.94026	5.2063e-05	Endothelial
1780	9530082P21Rik	1.62441	5.22202e-05	Endothelial
1781	Hoxb9	4.92836	5.26668e-05	Endothelial
1782	Mylip	0.655825	5.28971e-05	Endothelial
1783	Tbkbp1	1.97408	5.34537e-05	Endothelial
1784	Lcp1	0.352227	5.42157e-05	Endothelial
1785	Isg20	1.84904	5.59611e-05	Endothelial
1786	Gclm	0.361375	5.59611e-05	Endothelial
1787	Med1	0.544818	5.60325e-05	Endothelial
1788	Ep300	0.444399	5.61691e-05	Endothelial
1789	Slc25a5	0.249187	5.66601e-05	Endothelial
1790	Knop1	0.55465	5.71193e-05	Endothelial
1791	Zfp800	0.692163	5.79122e-05	Endothelial
1792	Wac	0.293851	5.80105e-05	Endothelial
1793	2510002D24Rik	0.718472	5.90856e-05	Endothelial
1794	Bcl7b	0.409543	5.90856e-05	Endothelial
1795	Sik3	0.587315	5.97142e-05	Endothelial
1796	2810474O19Rik	0.4042	6.04096e-05	Endothelial
1797	Bhlhe40	0.351424	6.0474e-05	Endothelial
1798	Golim4	0.432939	6.08749e-05	Endothelial
1799	Pear1	0.887252	6.16131e-05	Endothelial
1800	Tbk1	0.678037	6.1817e-05	Endothelial
1801	Trim34a	1.03692	6.21564e-05	Endothelial
1802	H2-Eb1	-0.486072	6.22256e-05	Endothelial
1803	Pcna	0.742537	6.3918e-05	Endothelial
1804	Skp1a	0.275849	6.50604e-05	Endothelial
1805	Tlnrd1	1.40519	6.57429e-05	Endothelial
1806	Snx9	0.67309	6.69662e-05	Endothelial
1807	Alkbh5	0.376203	6.94291e-05	Endothelial
1808	Dnajc21	0.435267	7.30786e-05	Endothelial
1809	Usp18	0.905134	7.35181e-05	Endothelial
1810	Tbca	0.253704	7.38489e-05	Endothelial
1811	Abr	0.673223	7.49011e-05	Endothelial
1812	Arhgap26	0.438082	7.54452e-05	Endothelial
1813	Asns	0.868364	7.61073e-05	Endothelial
1814	Ramp3	3.76653	7.61911e-05	Endothelial
1815	Zbtb46	1.96592	7.65905e-05	Endothelial
1816	Irak3	1.37759	7.67901e-05	Endothelial
1817	Mapkapk2	0.477433	7.89192e-05	Endothelial
1818	Acin1	0.257863	7.93084e-05	Endothelial
1819	Anpep	2.68458	8.14628e-05	Endothelial
1820	Dap	0.39124	8.15633e-05	Endothelial
1821	Hoxb2	0.793661	8.5148e-05	Endothelial
1822	Ttc7b	1.11497	8.5148e-05	Endothelial
1823	Tmtc1	0.984061	8.52726e-05	Endothelial
1824	Myh11	1.03294	8.5808e-05	Endothelial
1825	Tor1aip1	0.327391	8.63955e-05	Endothelial
1826	Lrrk1	1.18357	8.80325e-05	Endothelial
1827	Sap30	1.09195	9.12023e-05	Endothelial
1828	Ifitm5	4.01775	9.19625e-05	Endothelial
1829	Prpf38b	0.309855	9.23736e-05	Endothelial
1830	A4galt	1.96536	9.45277e-05	Endothelial
1831	Jdp2	0.678124	9.77159e-05	Endothelial
1832	Nr5a2	9.52526	0.00010074	Endothelial
1833	Slc25a32	1.27013	0.000101631	Endothelial
1834	Arf1	0.242962	0.000102781	Endothelial
1835	Cdc37	0.24422	0.000103695	Endothelial
1836	Ric1	0.730442	0.000105432	Endothelial
1837	Airn	1.47366	0.000105876	Endothelial
1838	Tcp11l2	0.482303	0.00010696	Endothelial
1839	Prkab1	1.11645	0.000108653	Endothelial
1840	Cdkn1c	0.350218	0.000110422	Endothelial
1841	Kdm2a	0.358664	0.000110977	Endothelial
1842	Trim56	0.530861	0.000112953	Endothelial
1843	Nsun6	0.774875	0.000114423	Endothelial
1844	Bud31	0.360165	0.000115266	Endothelial
1845	Acta2	0.764007	0.000115519	Endothelial
1846	Kin	0.648466	0.000116443	Endothelial
1847	Kcnb1	0.995034	0.000118667	Endothelial
1848	Lman1	0.30033	0.000119422	Endothelial
1849	Coro1c	0.424726	0.000120416	Endothelial
1850	Mllt10	0.422905	0.000120494	Endothelial
1851	Zrsr2	0.32686	0.000120757	Endothelial
1852	Farsb	0.700467	0.000120875	Endothelial
1853	Rrbp1	0.222019	0.000121004	Endothelial
1854	H3f3a	0.237021	0.000121566	Endothelial
1855	Glmp	0.405793	0.000123019	Endothelial
1856	Ubtd1	1.15109	0.000124552	Endothelial
1857	Pradc1	0.956145	0.000124558	Endothelial
1858	Kctd18	0.908793	0.000125702	Endothelial
1859	Cst6	1.46425	0.000127966	Endothelial
1860	Eny2	0.283448	0.000128523	Endothelial
1861	Hnrnpu	0.233104	0.000129286	Endothelial
1862	Inpp5k	0.607526	0.00013	Endothelial
1863	Larp4	0.382459	0.000131556	Endothelial
1864	Il6	3.65971	0.000134693	Endothelial
1865	Ttc32	0.982912	0.000135327	Endothelial
1866	Rnf138	0.719697	0.000139477	Endothelial
1867	Ecm1	-0.122202	0.000140095	Endothelial
1868	Nosip	0.63141	0.000141865	Endothelial
1869	Kbtbd2	0.652728	0.000144112	Endothelial
1870	Mttp	0.989657	0.000144195	Endothelial
1871	Fcf1	0.482052	0.000146228	Endothelial
1872	Vps72	0.512	0.000147805	Endothelial
1873	Ahctf1	0.662838	0.000148996	Endothelial
1874	Slc39a14	1.26116	0.000148996	Endothelial
1875	Nampt	0.408091	0.000151286	Endothelial
1876	Flii	0.448363	0.000151362	Endothelial
1877	Bag5	0.381696	0.000153606	Endothelial
1878	Mfap1b	0.439839	0.000154803	Endothelial
1879	Cggbp1	0.269759	0.000154803	Endothelial
1880	Lta4h	0.596546	0.000155827	Endothelial
1881	Isyna1	0.689396	0.000162738	Endothelial
1882	Trps1	0.582568	0.000163186	Endothelial
1883	Mdp1	0.451498	0.000163877	Endothelial
1884	Atp2a2	0.284182	0.000167247	Endothelial
1885	Zc3hav1	0.38692	0.000172453	Endothelial
1886	Ppt2	0.900517	0.000172769	Endothelial
1887	Ergic2	0.319898	0.000174284	Endothelial
1888	Pcnx	0.521196	0.000174978	Endothelial
1889	Ifi213	1.92797	0.000178011	Endothelial
1890	Rp9	0.300412	0.000178148	Endothelial
1891	Slc7a7	1.43235	0.000178242	Endothelial
1892	Lfng	2.11354	0.000180504	Endothelial
1893	Agfg1	0.40446	0.000191449	Endothelial
1894	Lbp	0.496024	0.000194126	Endothelial
1895	Lrat	3.03775	0.000195425	Endothelial
1896	Exoc3l	5.85091	0.000195536	Endothelial
1897	Cnih4	0.280033	0.000196379	Endothelial
1898	Pcdh12	6.87856	0.000199904	Endothelial
1899	Lzts2	0.453063	0.000203118	Endothelial
1900	S100a16	0.25461	0.000208182	Endothelial
1901	Ankrd10	0.457836	0.000210121	Endothelial
1902	Med10	0.421213	0.000211722	Endothelial
1903	Smarce1	0.349033	0.000215433	Endothelial
1904	Nfya	0.964065	0.000216155	Endothelial
1905	Atl2	1.07187	0.000218164	Endothelial
1906	Mrpl17	0.303436	0.000221916	Endothelial
1907	Arglu1	0.237401	0.000222994	Endothelial
1908	Terf1	0.623728	0.000223017	Endothelial
1909	Skil	0.578637	0.000227068	Endothelial
1910	Yap1	0.507143	0.000230017	Endothelial
1911	Zscan26	0.564147	0.000230512	Endothelial
1912	Tead4	7.29765	0.000232145	Endothelial
1913	Pik3r6	3.62761	0.000234857	Endothelial
1914	H2-DMb1	0.235325	0.000236732	Endothelial
1915	B3gnt3	7.26477	0.000236978	Endothelial
1916	Actl6a	0.485945	0.000238054	Endothelial
1917	Wapl	0.306762	0.000239156	Endothelial
1918	Msh5	2.7823	0.000242411	Endothelial
1919	Ddx47	0.637665	0.000244299	Endothelial
1920	Dpm1	0.299754	0.00025139	Endothelial
1921	Klhl2	0.96886	0.000258298	Endothelial
1922	Chtf8	0.56621	0.000262871	Endothelial
1923	Ctps	1.11408	0.000263085	Endothelial
1924	Ubap2l	0.253241	0.000263702	Endothelial
1925	Nr1d2	0.550807	0.000265042	Endothelial
1926	Neurl1b	3.31912	0.000268116	Endothelial
1927	Btbd3	0.307705	0.000270659	Endothelial
1928	Pum1	0.289252	0.000276115	Endothelial
1929	Cables2	1.34474	0.000277869	Endothelial
1930	Arfgef1	0.322704	0.000277869	Endothelial
1931	Ankrd12	0.237229	0.000280479	Endothelial
1932	Casp3	1.04811	0.000282594	Endothelial
1933	Ccdc86	0.821629	0.000286381	Endothelial
1934	Tbpl1	0.586708	0.000290302	Endothelial
1935	Zfyve9	0.464955	0.000291071	Endothelial
1936	Tnfrsf1b	2.18287	0.000294731	Endothelial
1937	Zfp330	0.506595	0.00029569	Endothelial
1938	Sept11	0.305419	0.000303153	Endothelial
1939	Lysmd3	0.653911	0.000308183	Endothelial
1940	Ubr1	0.461252	0.000308994	Endothelial
1941	Socs5	0.735279	0.000310699	Endothelial
1942	Smarcd2	0.937817	0.000313359	Endothelial
1943	Glyr1	0.342876	0.000314155	Endothelial
1944	Srp19	0.260169	0.000316233	Endothelial
1945	Ppp1r14a	1.0285	0.000319703	Endothelial
1946	Irf2bp2	0.301259	0.000322386	Endothelial
1947	Ctdnep1	0.53982	0.000327638	Endothelial
1948	Pde2a	3.23722	0.000329108	Endothelial
1949	Edc3	1.29934	0.000329686	Endothelial
1950	Eif2s3x	0.583604	0.000331697	Endothelial
1951	Mir155hg	1.76519	0.000332543	Endothelial
1952	Emid1	2.37909	0.000333029	Endothelial
1953	Kank1	0.532317	0.000335742	Endothelial
1954	Rusc1	0.646238	0.00034478	Endothelial
1955	Kdelc2	0.788373	0.000353653	Endothelial
1956	Utp14a	0.577761	0.000353763	Endothelial
1957	Esd	0.237261	0.00035425	Endothelial
1958	Tle4	0.276846	0.000359483	Endothelial
1959	Herc2	0.23492	0.000367821	Endothelial
1960	Eaf1	1.20375	0.000369812	Endothelial
1961	9530026P05Rik	1.68842	0.000369887	Endothelial
1962	Map3k6	2.0848	0.00037189	Endothelial
1963	Cdk2ap1	0.351247	0.00037391	Endothelial
1964	Cmc1	0.514834	0.000377331	Endothelial
1965	Dtx3l	0.748718	0.000378468	Endothelial
1966	Ssb	0.234094	0.000402916	Endothelial
1967	Slc7a5	2.27746	0.000409192	Endothelial
1968	Wls	0.363314	0.000419524	Endothelial
1969	Srsf7	0.269196	0.000425559	Endothelial
1970	Asb4	6.67456	0.000426779	Endothelial
1971	Cyb5b	0.353027	0.000435138	Endothelial
1972	Rtp3	3.99983	0.000448343	Endothelial
1973	Mn1	3.10546	0.000448393	Endothelial
1974	Kcnj8	2.24078	0.000453086	Endothelial
1975	Nin	0.636897	0.000469829	Endothelial
1976	Vat1	0.239351	0.000474034	Endothelial
1977	Srsf10	0.259444	0.000476501	Endothelial
1978	Fbxl18	0.656333	0.0004783	Endothelial
1979	Dopey1	0.637944	0.000480337	Endothelial
1980	Plcg2	2.11136	0.000481747	Endothelial
1981	Trim12a	0.43566	0.000490454	Endothelial
1982	Lcorl	0.697729	0.000492099	Endothelial
1983	Wbp1l	0.799248	0.00049529	Endothelial
1984	Supt5	0.31422	0.000495645	Endothelial
1985	Lsm14a	0.414494	0.000499907	Endothelial
1986	Srp9	0.223488	0.000500697	Endothelial
1987	Ftl1	0.114086	0.000500697	Endothelial
1988	Vsir	0.716114	0.000500697	Endothelial
1989	Lxn	0.325168	0.000501649	Endothelial
1990	Zmiz1	0.29218	0.000503452	Endothelial
1991	Gm35167	5.94202	0.000504661	Endothelial
1992	Ddx39	0.69429	0.000506001	Endothelial
1993	Ltbr	0.608057	0.000506279	Endothelial
1994	Erc1	0.594523	0.000509144	Endothelial
1995	Cdca7	2.4271	0.000515282	Endothelial
1996	Rpain	0.454116	0.000517664	Endothelial
1997	Eif3i	0.226692	0.000521477	Endothelial
[truncated: 49,300 more rows]
