# Supplementary figures and images for: Tiered sympathetic control of cardiac function revealed by viral tracing and single cell transcriptome profiling
Source: eLife journal article supplement (doi:10.7554/elife.86295), 2023-05-10

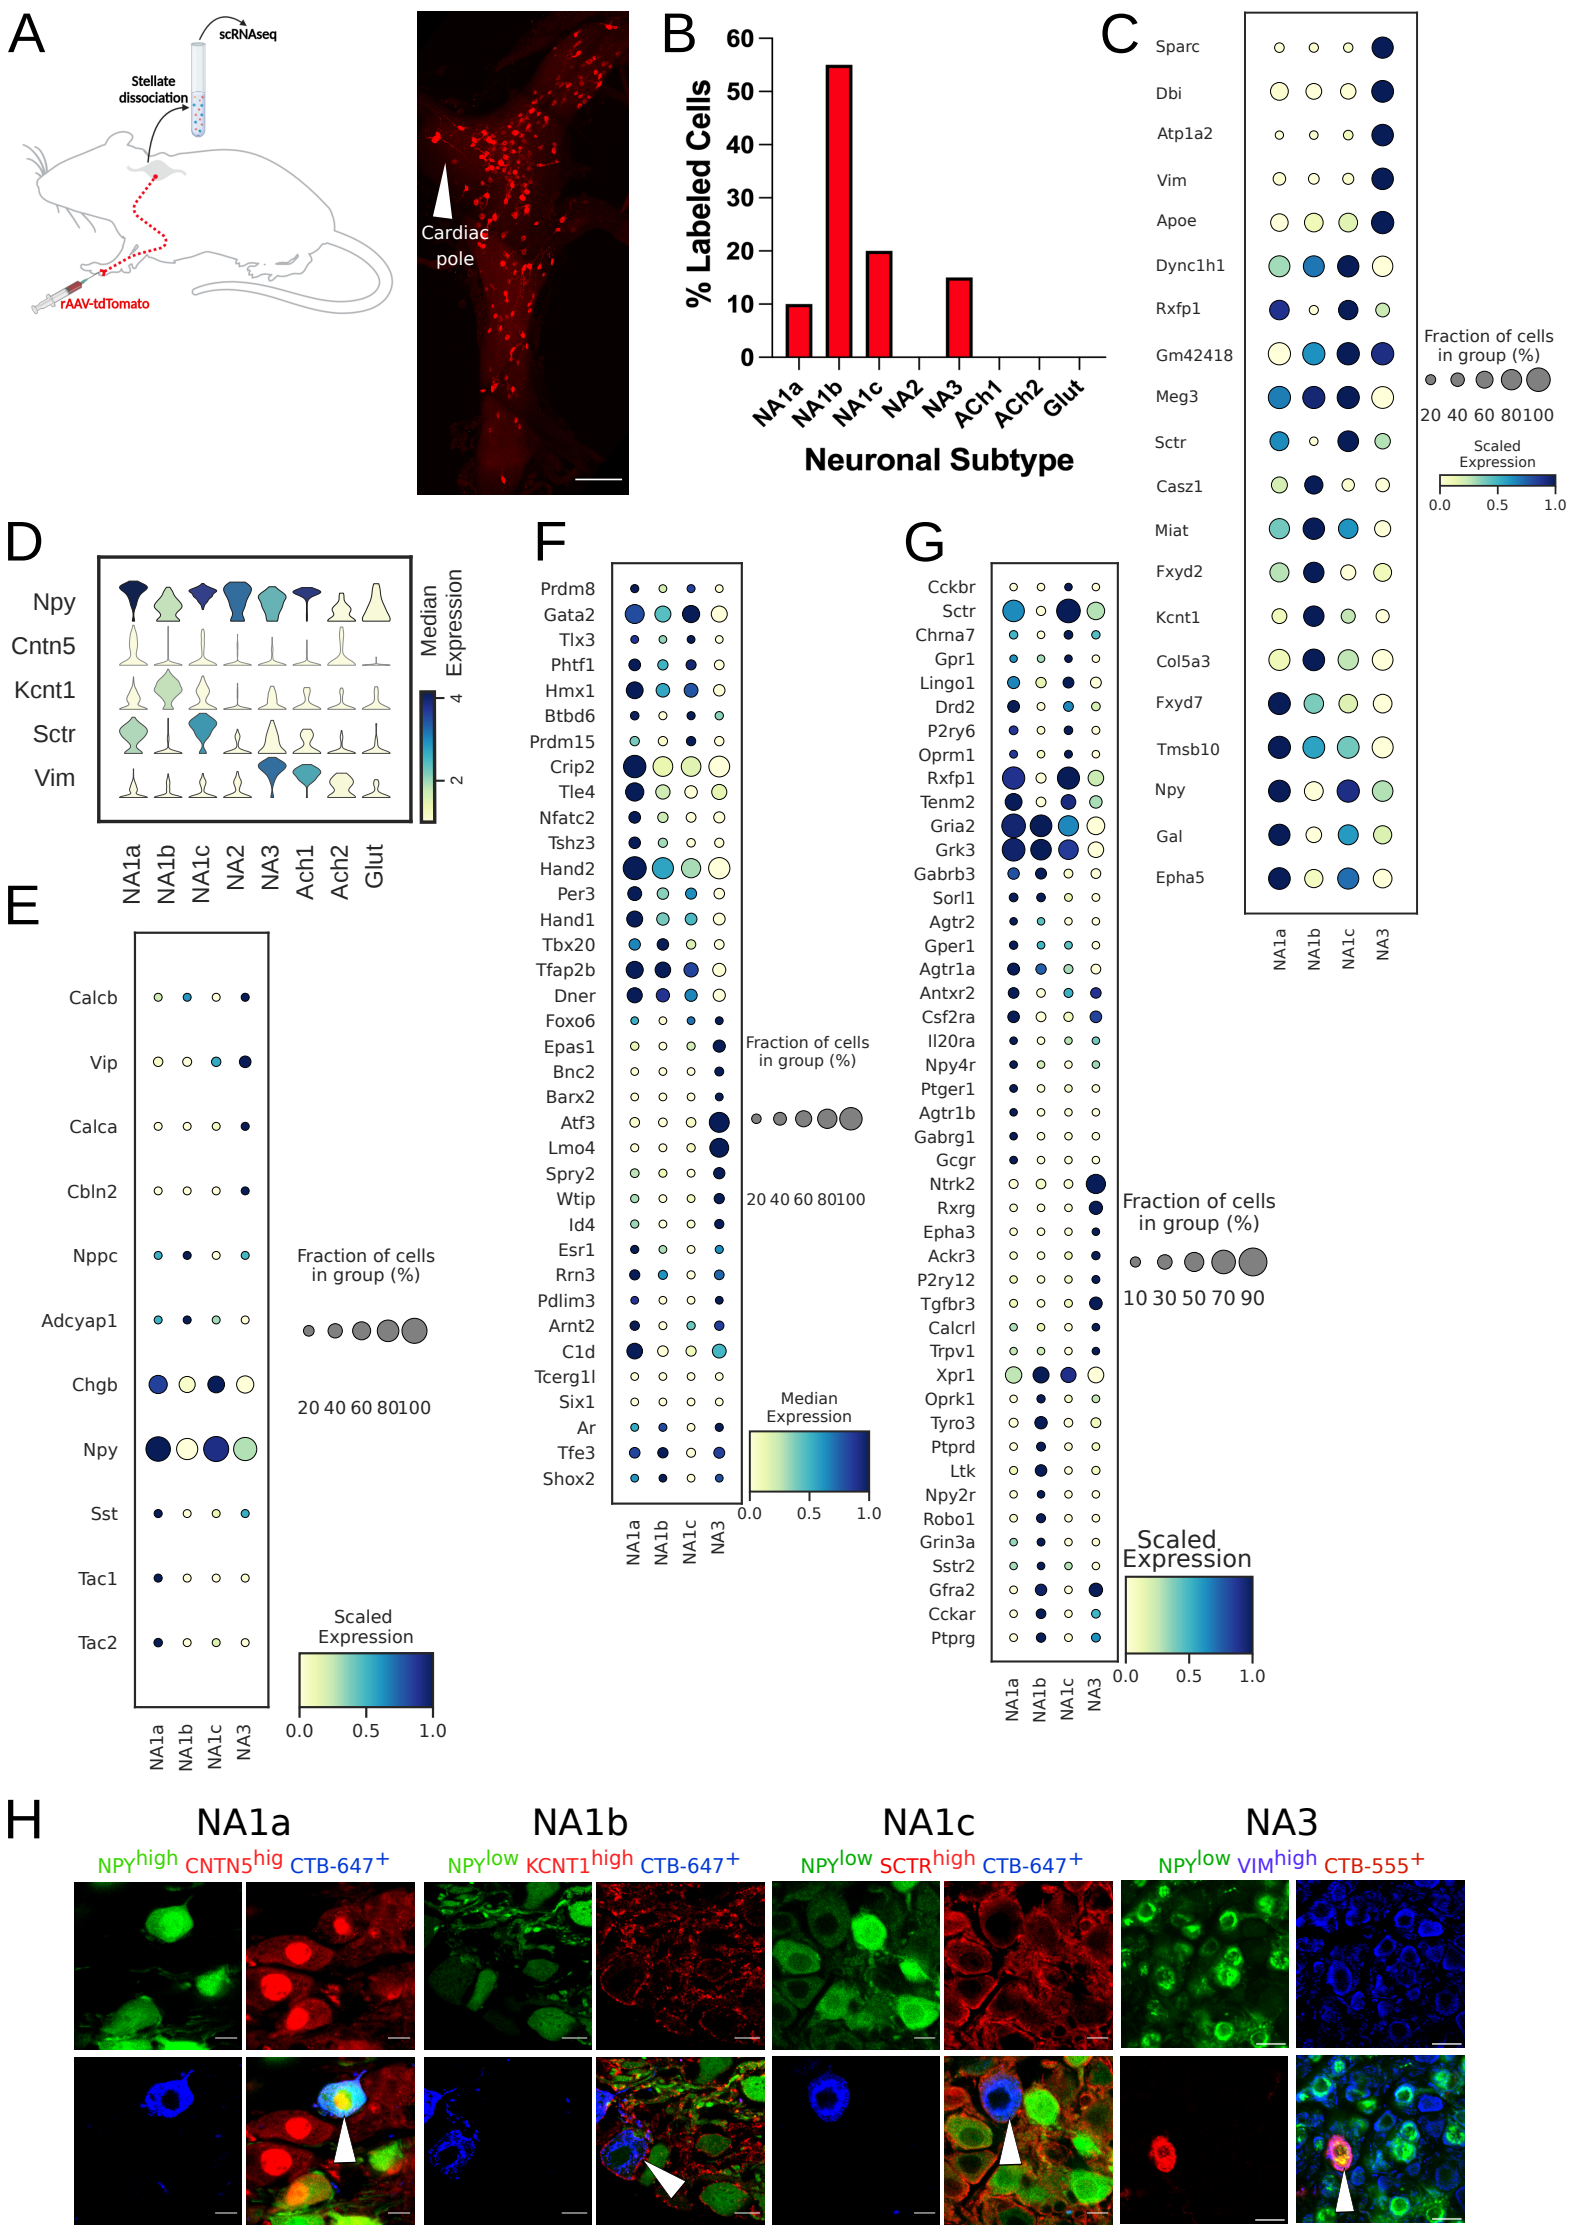

Supplement: supp [file elife-86295-supp-v1.zip]

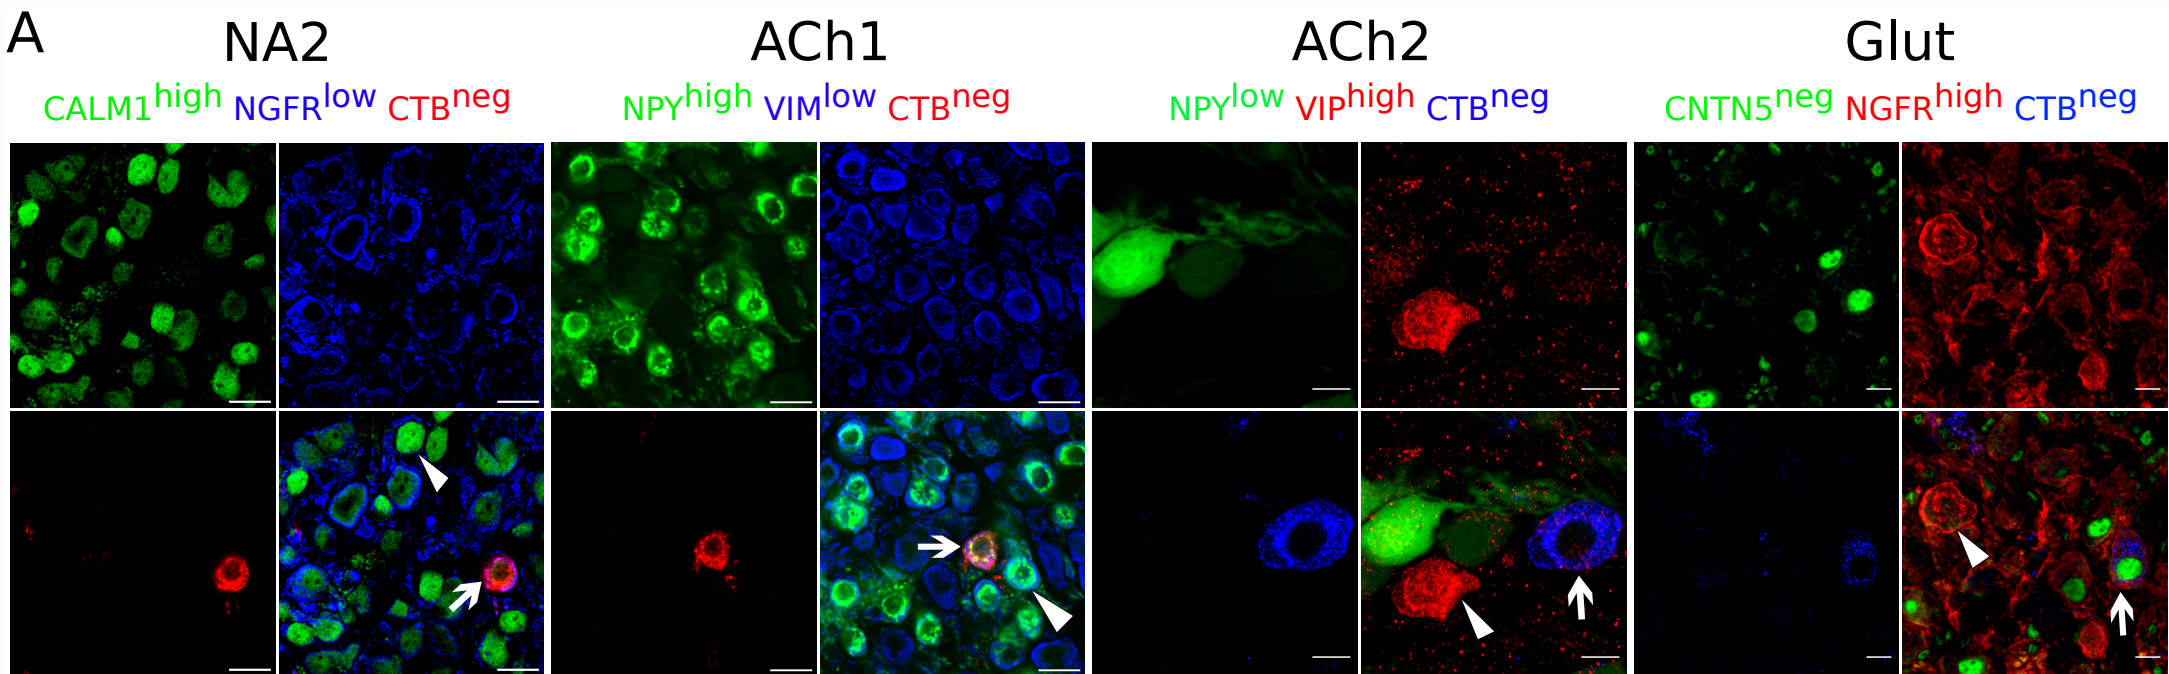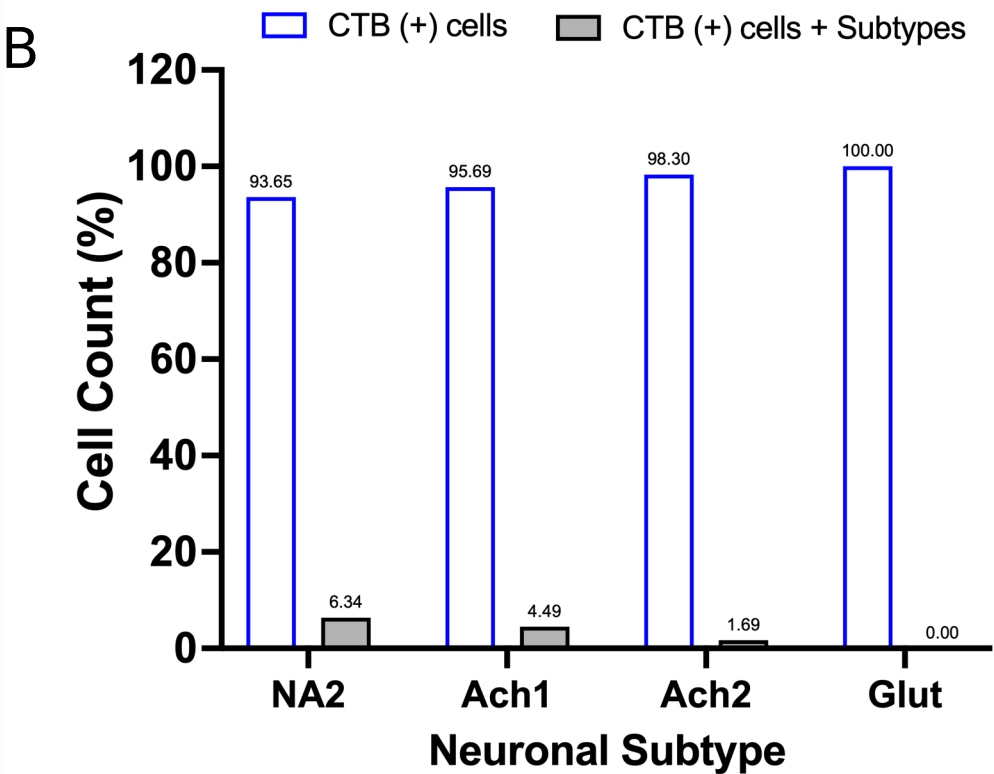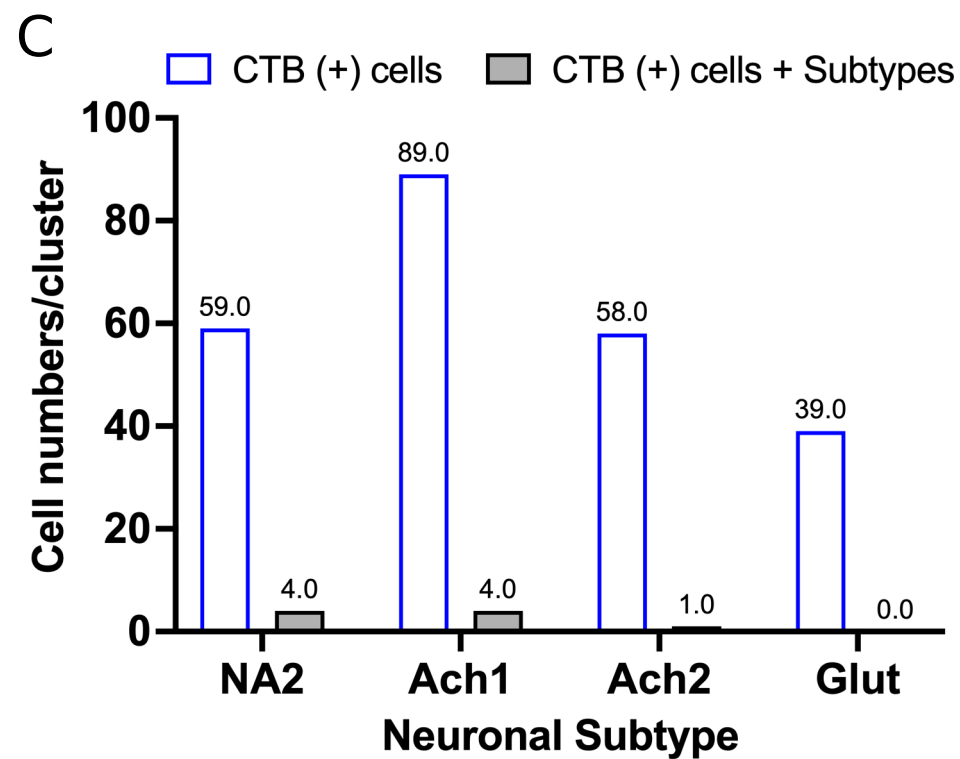

Supplement: supp [file elife-86295-supp-v1.zip]

A

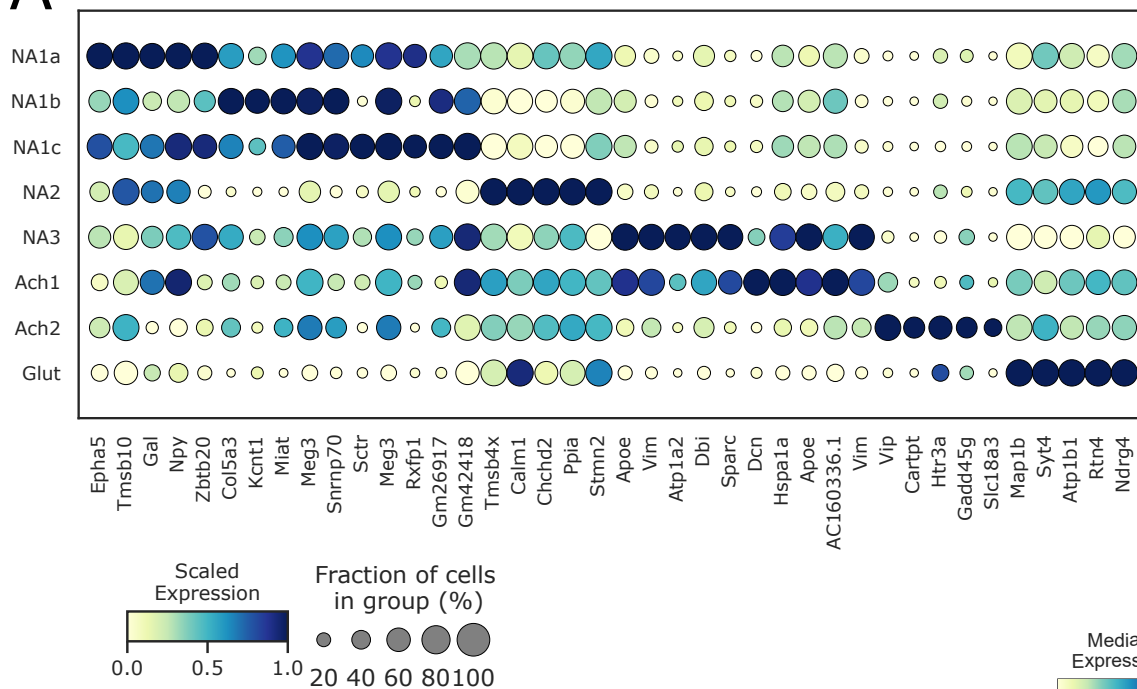

B

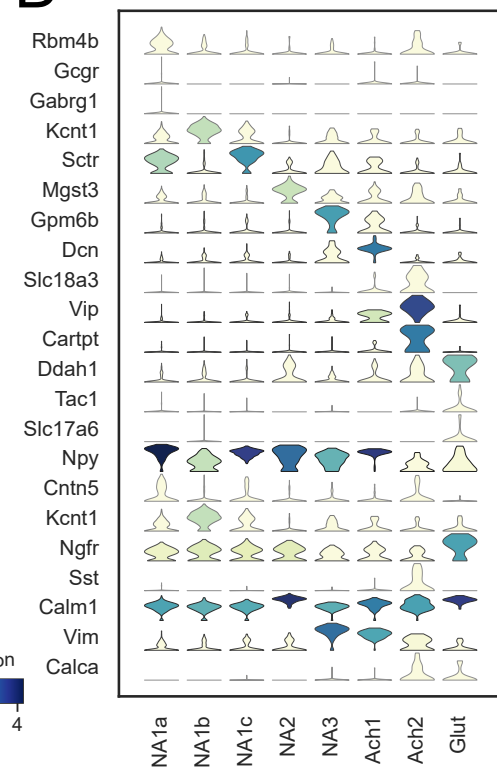

C

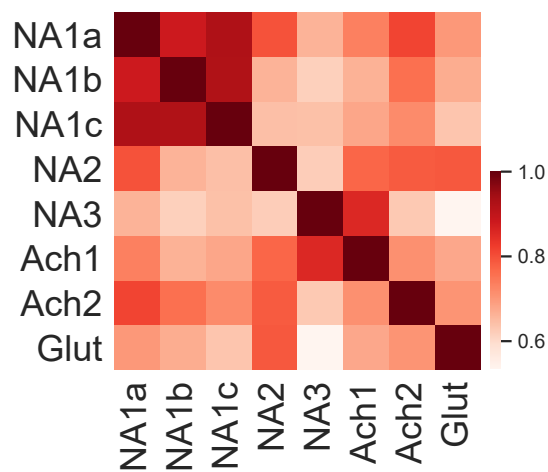

D

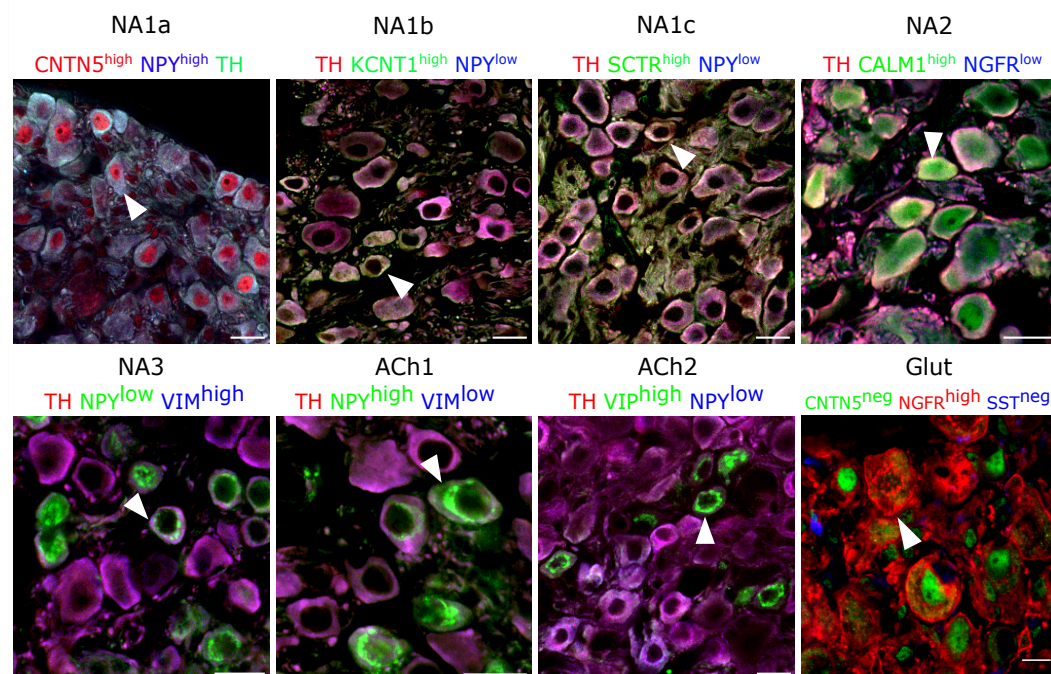

Supplement: supp [file elife-86295-supp-v1.zip]

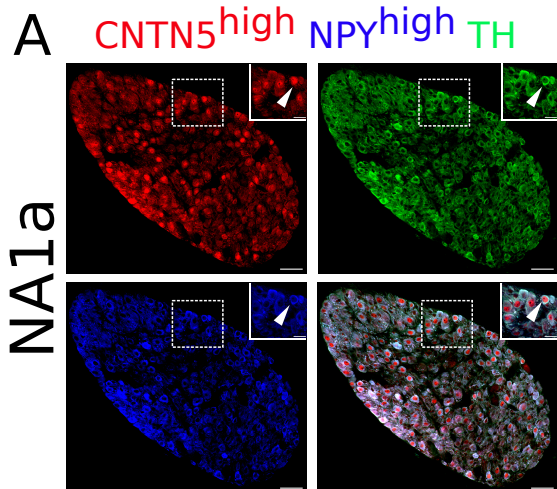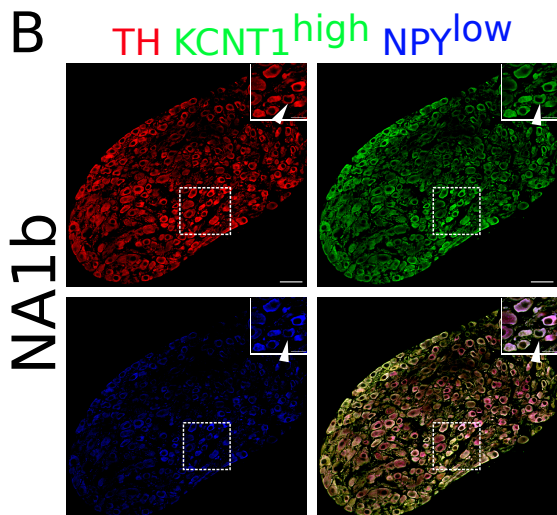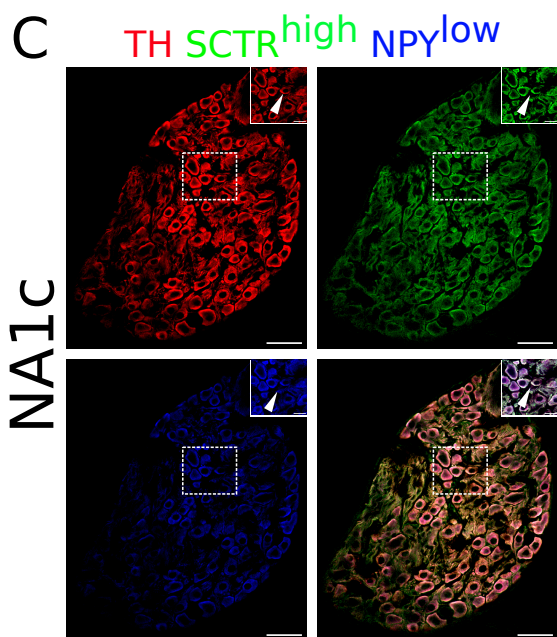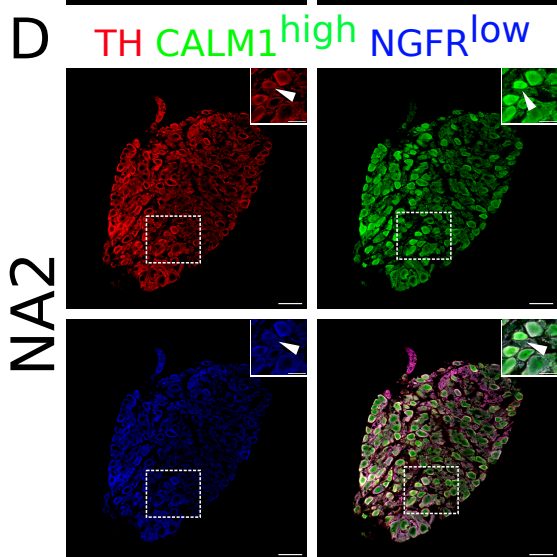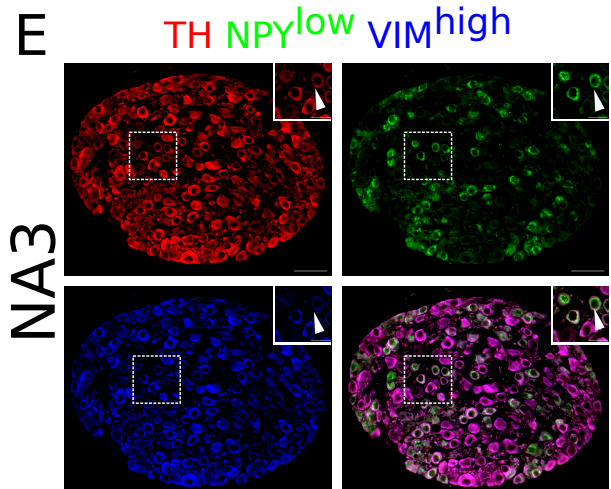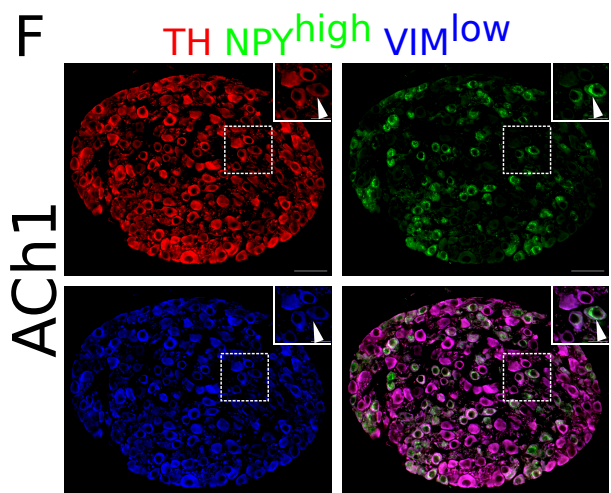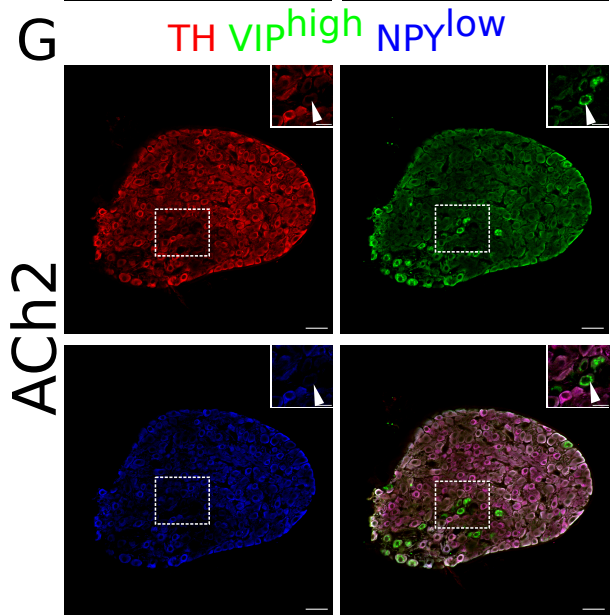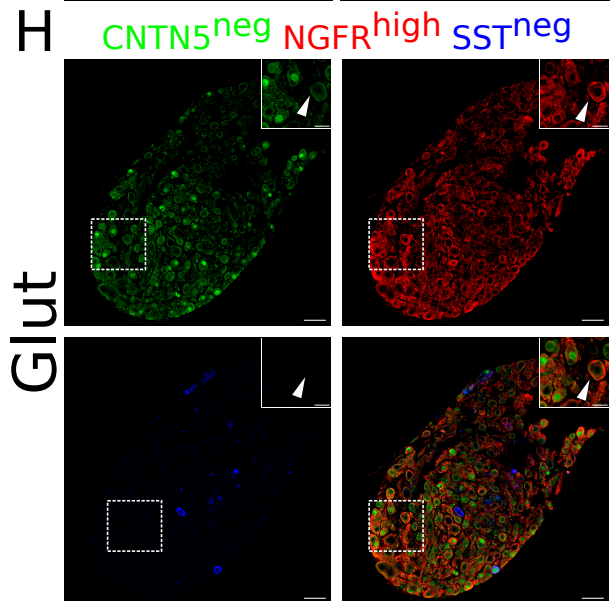

Supplement: supp [file elife-86295-supp-v1.zip]

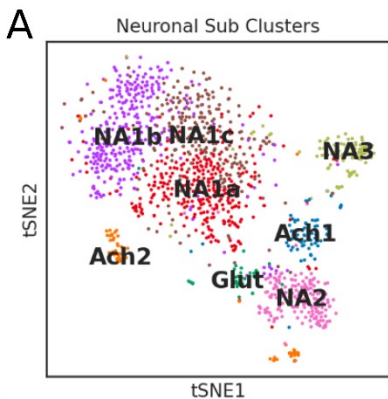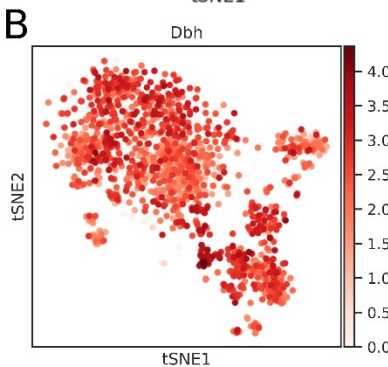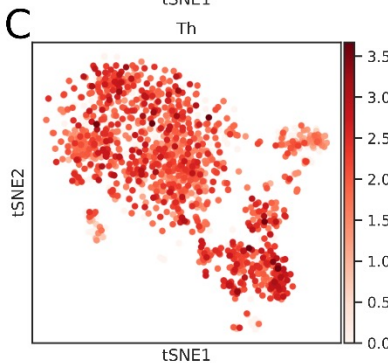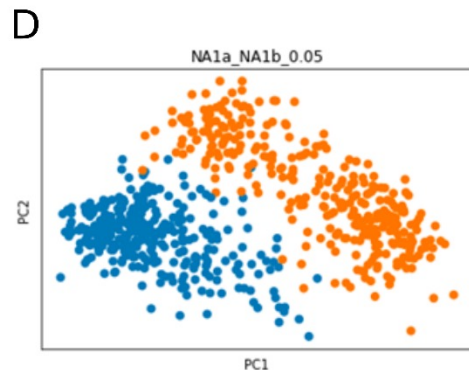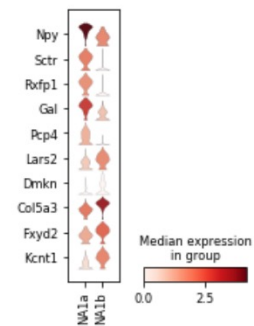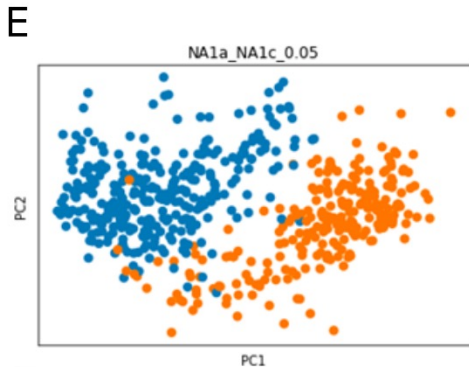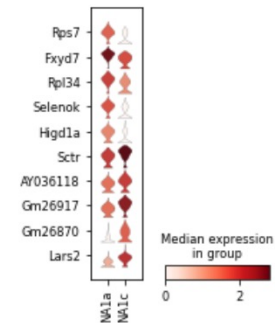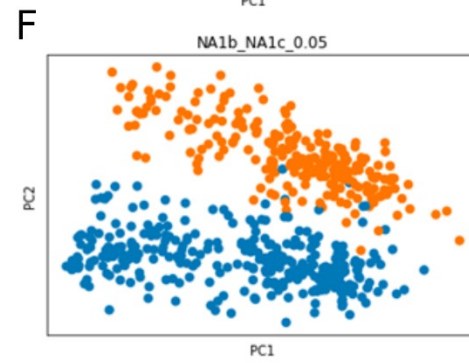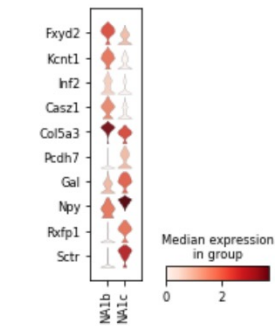

Supplement: supp [file elife-86295-supp-v1.zip]

A

|      |     |     |     |
|------|-----|-----|-----|
| NA1a | 33  | 97  | 186 |
| NA1b | 205 | 95  | 11  |
| NA1c | 8   | 145 | 86  |
| NA3  | 44  | 48  | 7   |

B

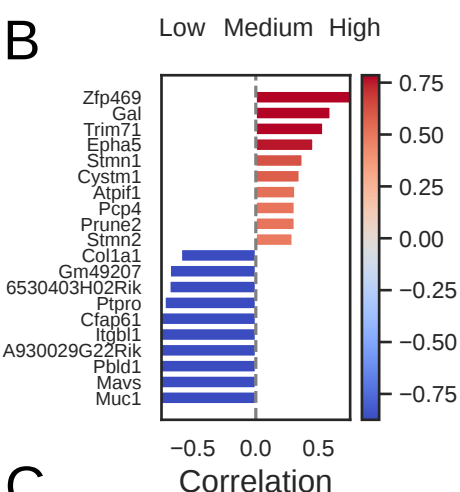

C

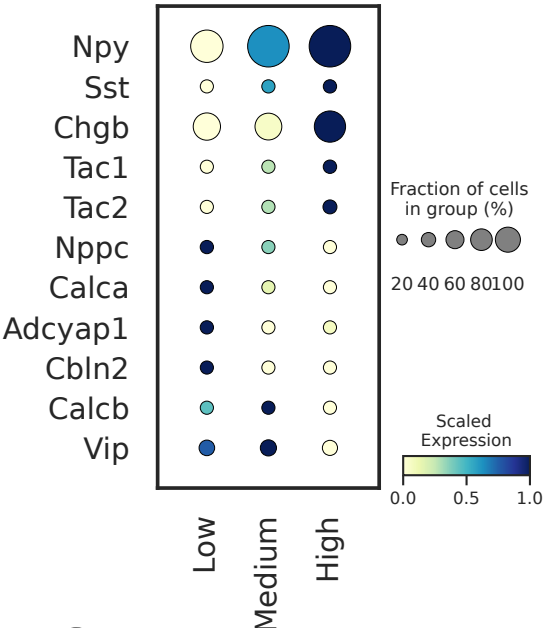

G

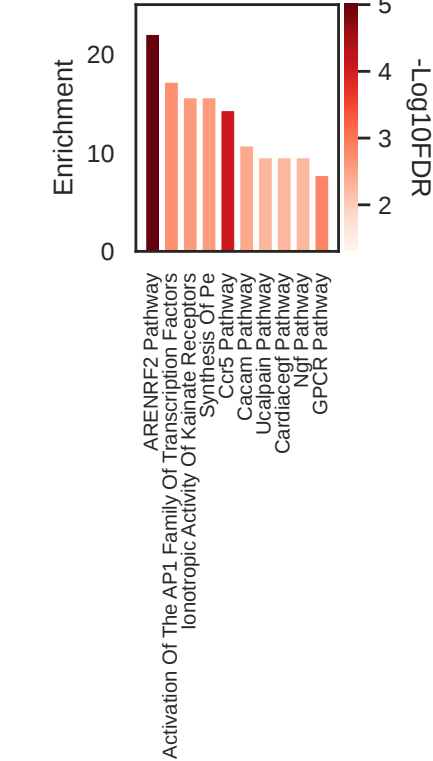

D

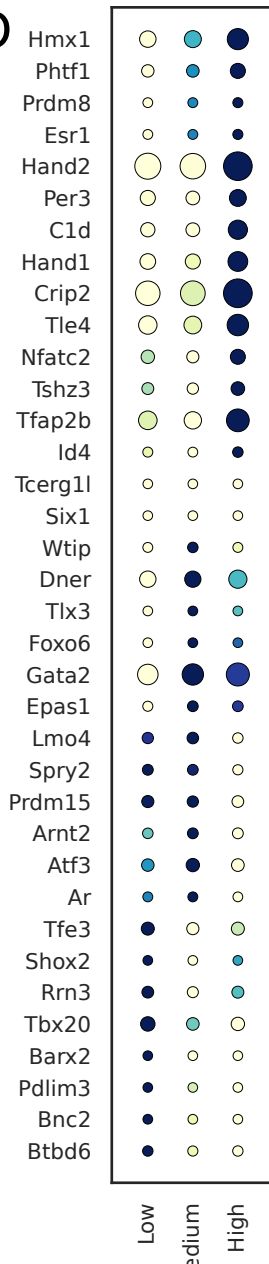

H

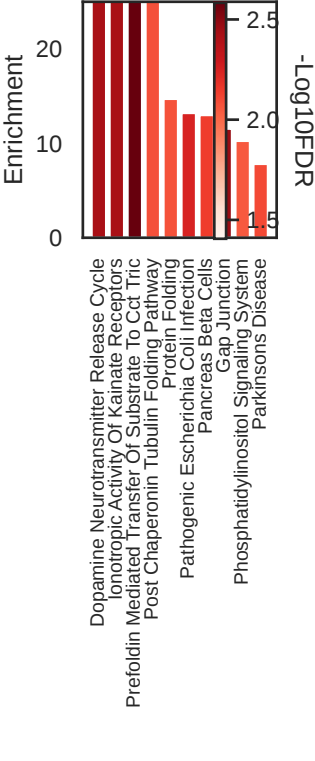

E

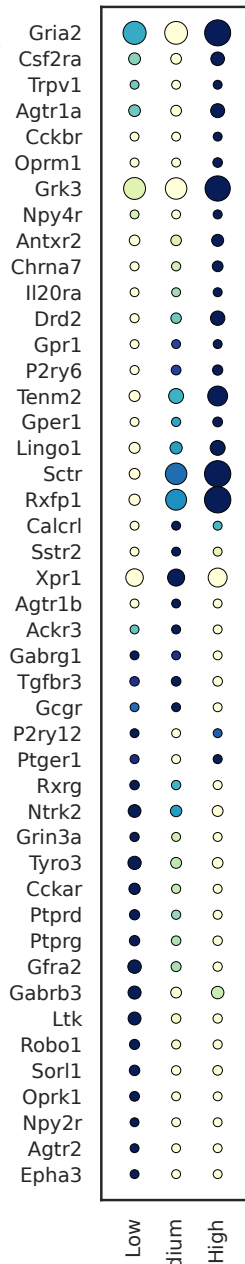

I

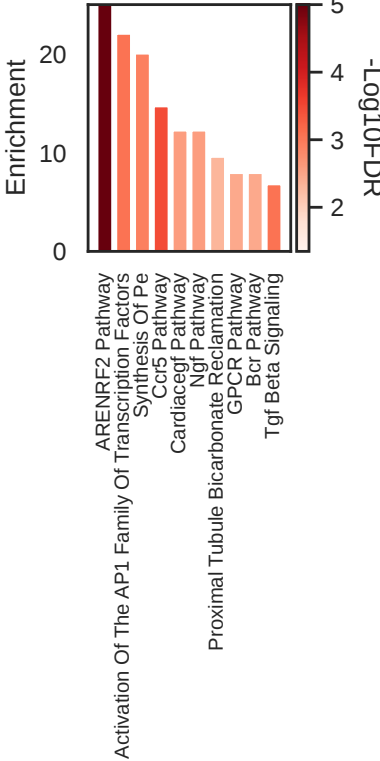

F

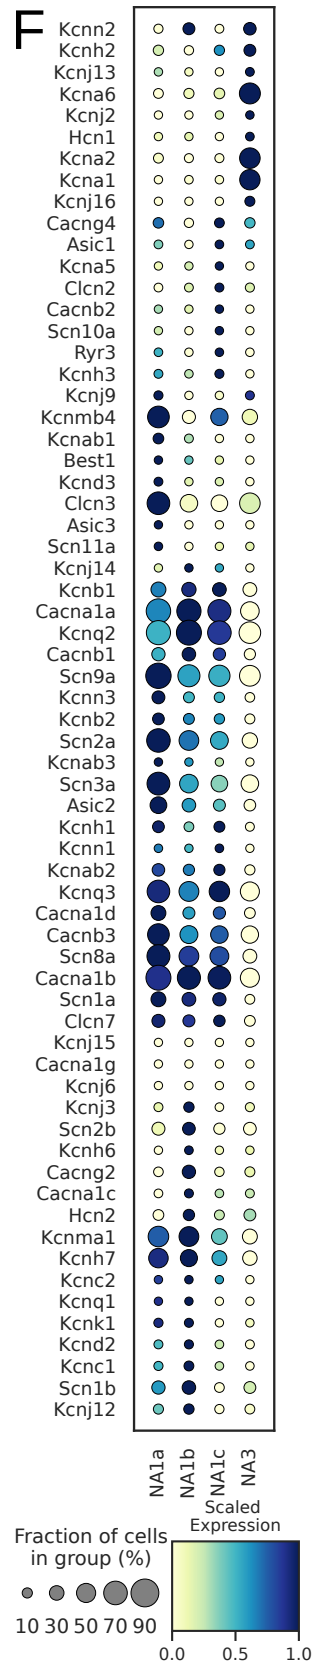

Supplement: supp [file elife-86295-supp-v1.zip]

Troponin + AAV-GFP

PGP9.5

AAV-GFP

PGP9.5 + AAV-GFP

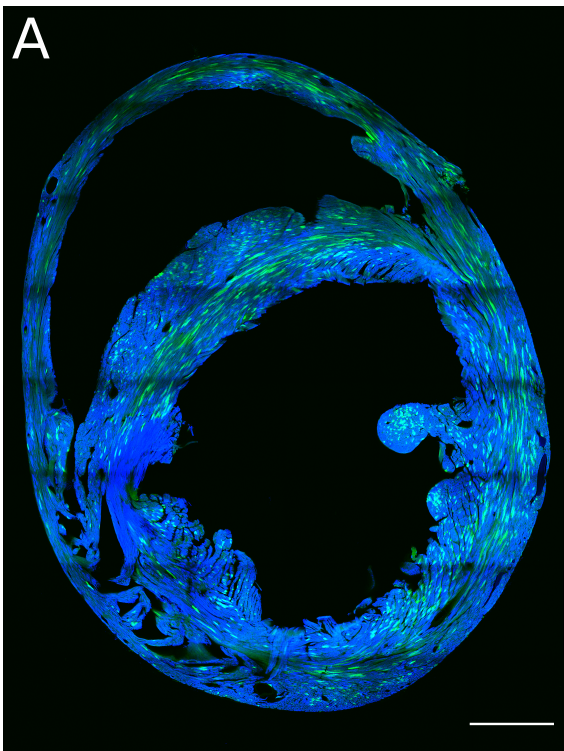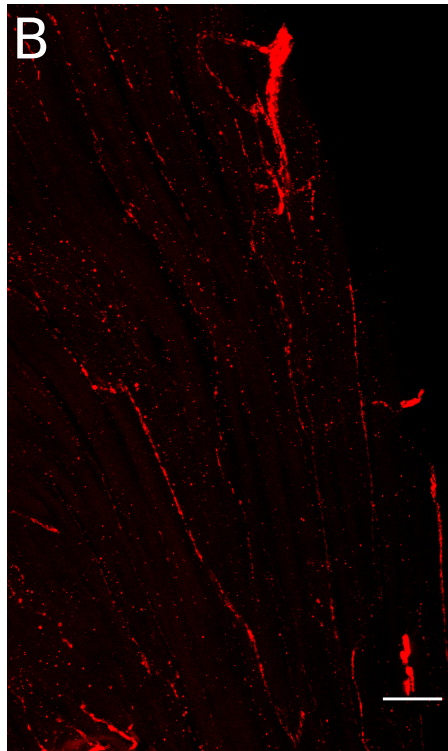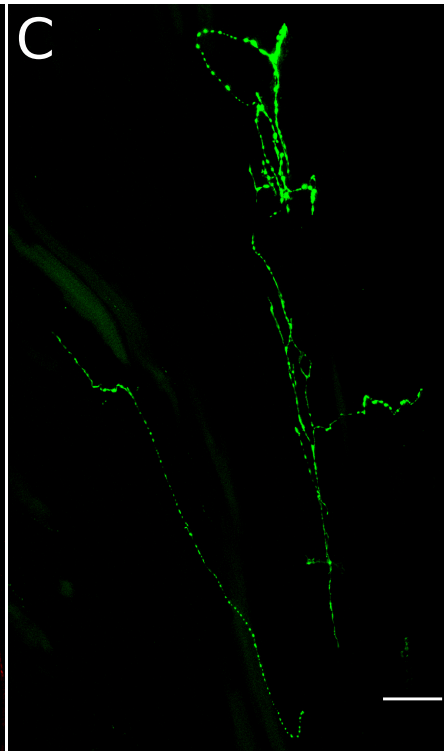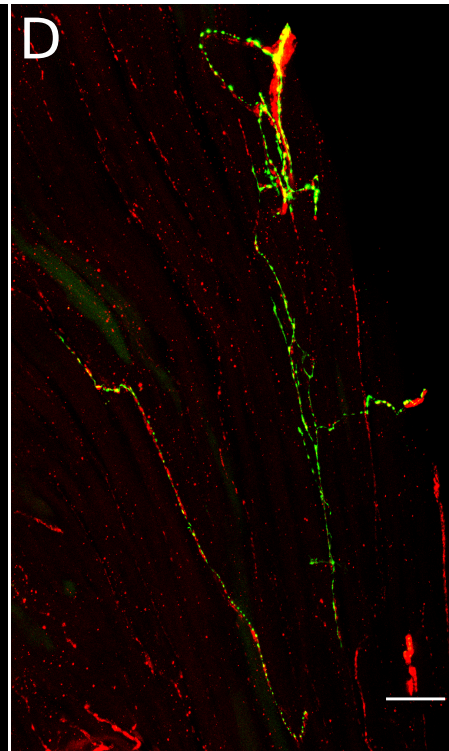

Supplement: supp [file elife-86295-supp-v1.zip]
